# Supplementary material for: Dental anomalies and lesions in Eastern Atlantic harbor seals, Phoca vitulina vitulina (Carnivora, Phocidae), from the German North Sea
Source: PLoS One. 2018 Oct 3;13(10):e0204079. doi: 10.1371/journal.pone.0204079 (PMC6169878; doi:10.1371/journal.pone.0204079)
Supplement: S1 Table — (XLSX) [file pone.0204079.s002.xlsx]

## Sheet: Table Phoca vitulina ZIK
Identification number (ZIK)	Provenance	Collection year	Age at death [yr]	Age class (1: neonatal/early postnatal, 2: juvenile/subadult, 3: adult)	Sex	Numerical dental anomaly	Abnormal tooth morphology	Tooth fracture	Periapical lesion
1966	Wadden Sea of Schleswig-Holstein	1961	0.5	2	female
4626	North Sea	1964	5	3	male	x
12060	Wadden Sea of Schleswig-Holstein	1971	6	3	female
16419	Wadden Sea of Schleswig-Holstein	1974	0.25	2	male
16702	Wadden Sea of Schleswig-Holstein	1975	4	2	female
16703	Wadden Sea of Schleswig-Holstein	1974	1.33333	2	female
16706	Wadden Sea of Schleswig-Holstein	1974	0.333333	2	female
16708	Wadden Sea of Schleswig-Holstein	1974	0.333333	2	male
16709	Wadden Sea of Schleswig-Holstein	1974	0.333333	2	female
16711	Wadden Sea of Schleswig-Holstein	1974	0.333333	2	male
16712	Wadden Sea of Schleswig-Holstein	1974	0.25	2	female
16713	Wadden Sea of Schleswig-Holstein	1974	0.25	2	male
16714	Wadden Sea of Schleswig-Holstein	1974	0.333333	2	male
16715	Wadden Sea of Schleswig-Holstein	1974	1.33333	2	female
16721	Wadden Sea of Schleswig-Holstein	1974	1.16667	2	male
16724	Wadden Sea of Schleswig-Holstein	1974	0.166667	2	male
16725	Wadden Sea of Schleswig-Holstein	1974	1.16667	2	male
16726	Wadden Sea of Schleswig-Holstein	1974	7	3	female
16727	Wadden Sea of Schleswig-Holstein	1974	0.166667	2	female
16728	Wadden Sea of Schleswig-Holstein	1974	0.25	2	female
16738	Wadden Sea of Schleswig-Holstein	1974	0.0833333	1	male
16739	Wadden Sea of Schleswig-Holstein	1974	1.16667	2	male
16740	Wadden Sea of Schleswig-Holstein	1974	0.0769231	1	female
16742	Wadden Sea of Schleswig-Holstein	1974	0.0769231	1	female
16743	Wadden Sea of Schleswig-Holstein	1974	1.16667	2	female
16745	Wadden Sea of Schleswig-Holstein	1974	0.166667	2	female
16746	Wadden Sea of Schleswig-Holstein	1974	7	3	male
16747	Wadden Sea of Schleswig-Holstein	1974	22	3	female
16749	Wadden Sea of Schleswig-Holstein	1974	2	2	female
16750	Wadden Sea of Schleswig-Holstein	1974	1.08333	2	male
16898	Wadden Sea of Schleswig-Holstein	1975	0.0769231	1	male
16899	Wadden Sea of Schleswig-Holstein	1975	1.08333	2	male
17033	Wadden Sea of Schleswig-Holstein	1975	22	3	male	x			x
17034	Wadden Sea of Schleswig-Holstein	1975	24	3	female				x
17097	Wadden Sea of Schleswig-Holstein	1975	0.333333	2	female	x
17098	Wadden Sea of Schleswig-Holstein	1975	0.25	2	male
17099	Wadden Sea of Schleswig-Holstein	1975	0.333333	2	female
17100	Wadden Sea of Schleswig-Holstein	1975	0.0833333	1	female
17101	Wadden Sea of Schleswig-Holstein	1975	0.166667	2	male
17102	Wadden Sea of Schleswig-Holstein	1975	1.08333	2	male
17103	Wadden Sea of Schleswig-Holstein	1975	0.166667	2	female
17105	Wadden Sea of Schleswig-Holstein	1975	0.0833333	1	male
17119	Wadden Sea of Schleswig-Holstein	1975	2	2	male
17120	Wadden Sea of Schleswig-Holstein	1975	0.333333	2	female
17122	Wadden Sea of Schleswig-Holstein	1975	0.166667	2	female		x
17123	Wadden Sea of Schleswig-Holstein	1975	0.25	2	female	x	x
17124	Wadden Sea of Schleswig-Holstein	1975	1.08333	2	male
17125	Wadden Sea of Schleswig-Holstein	1975	0.333333	2	male
17159	Wadden Sea of Schleswig-Holstein	1975	0.25	2	female
17160	Wadden Sea of Schleswig-Holstein	1975	0.25	2	female
17161	Wadden Sea of Schleswig-Holstein	1975	1.16667	2	female
17162	Wadden Sea of Schleswig-Holstein	1975	0.166667	2	male
17163	Wadden Sea of Schleswig-Holstein	1975	1.33333	2	male
17195	Wadden Sea of Schleswig-Holstein	1975	10	3	female
17213	Wadden Sea of Schleswig-Holstein	1975	0.416667	2	male		x
17215	Wadden Sea of Schleswig-Holstein	1975	0.416667	2	male
17216	Wadden Sea of Schleswig-Holstein	1976	0.166667	2	male
17217	Wadden Sea of Schleswig-Holstein	1976	0.5	2	male
17218	Wadden Sea of Schleswig-Holstein	1975	0.5	2	male		x
17222	Wadden Sea of Schleswig-Holstein	1975	0.416667	2	male
17223	Wadden Sea of Schleswig-Holstein	1975	0.416667	2	male
17224	Wadden Sea of Schleswig-Holstein	1975	0.416667	2	male
17225	Wadden Sea of Schleswig-Holstein	1975	1.25	2	female
17226	Wadden Sea of Schleswig-Holstein	1975	0.166667	2	female
17227	Wadden Sea of Schleswig-Holstein	1975	0.25	2	male
17228	Wadden Sea of Schleswig-Holstein	1975	0.25	2	male
17230	Wadden Sea of Schleswig-Holstein	1975	2	2	male		x
17233	Wadden Sea of Schleswig-Holstein	1975	0.166667	2	female
17234	Wadden Sea of Schleswig-Holstein	1975	0.0833333	1	male	x
17235	Wadden Sea of Schleswig-Holstein	1975	2	2	female
17236	Wadden Sea of Schleswig-Holstein	1975	1.33333	2	male
17237	Wadden Sea of Schleswig-Holstein	1975	0.166667	2	female
17238	Wadden Sea of Schleswig-Holstein	1975	0.166667	2	female
17239	Wadden Sea of Schleswig-Holstein	1975	1.16667	2	male
17243	Wadden Sea of Schleswig-Holstein	1975	22	3	female			x	x
17245	Wadden Sea of Schleswig-Holstein	1975	0.166667	2	male
17247	Wadden Sea of Schleswig-Holstein	1975	2	2	male
17249	Wadden Sea of Schleswig-Holstein	1975	0.916667	2	male
17250	Wadden Sea of Schleswig-Holstein	1975	0.0384615	1	male
17297	Wadden Sea of Schleswig-Holstein	1976	0.583333	2	female
17469	Wadden Sea of Schleswig-Holstein	1976	0.5	2	male
17504	Wadden Sea of Schleswig-Holstein	1976	0.583333	2	female
17505	Wadden Sea of Schleswig-Holstein	1976	1.75	2	female
17506	Wadden Sea of Schleswig-Holstein	1976	0.75	2	female
17509	Wadden Sea of Schleswig-Holstein	1976	1.66667	2	male
17512	Wadden Sea of Schleswig-Holstein	1976	10	3	male
17513	Wadden Sea of Schleswig-Holstein	1976	0.666667	2	female			x
17514	Wadden Sea of Schleswig-Holstein	1976	5	2	male
17622	Wadden Sea of Schleswig-Holstein	1976	1.25	2	female
17623	Wadden Sea of Schleswig-Holstein	1976	0.166667	2	female
17624	Wadden Sea of Schleswig-Holstein	1976	0.166667	2	female
17627	Wadden Sea of Schleswig-Holstein	1976	1.16667	2	male
17628	Wadden Sea of Schleswig-Holstein	1976	2	2	female
17629	Wadden Sea of Schleswig-Holstein	1976	0.0384615	1	male
17630	Wadden Sea of Schleswig-Holstein	1976	0.166667	2	female
17631	Wadden Sea of Schleswig-Holstein	1976	5	2	male		x
17632	Wadden Sea of Schleswig-Holstein	1976	9	3	female
17633	Wadden Sea of Schleswig-Holstein	1976	0.916667	2	female
17635	Wadden Sea of Schleswig-Holstein	1976	1.83333	2	female
17636	Wadden Sea of Schleswig-Holstein	1976	0.833333	2	female
17637	Wadden Sea of Schleswig-Holstein	1976	0.833333	2	female
17652	Wadden Sea of Schleswig-Holstein	1976	0.0384615	1	female
17653	Wadden Sea of Schleswig-Holstein	1976	0.0384615	1	male
17667	Wadden Sea of Schleswig-Holstein	1976	1.08333	2	female
17854	Wadden Sea of Schleswig-Holstein	1976	2	2	female
17856	Wadden Sea of Schleswig-Holstein	1976	1.08333	2	female
17857	Wadden Sea of Schleswig-Holstein	1976	0.166667	2	male
17859	Wadden Sea of Schleswig-Holstein	1976	0.25	2	female
17860	Wadden Sea of Schleswig-Holstein	1976	2	2	male
17861	Wadden Sea of Schleswig-Holstein	1976	0.0833333	1	female
18057	Wadden Sea of Schleswig-Holstein	1976	3	2	male
18278	Wadden Sea of Hamburg & Elbe Estuary	1977	0.583333	2	female
18279	Wadden Sea of Schleswig-Holstein	1976	0.333333	2	male
19285	Wadden Sea of Schleswig-Holstein	1976	25	3	female
19315	Wadden Sea of Schleswig-Holstein	1977	4	2	female
19316	Wadden Sea of Schleswig-Holstein	1977	14	3	male	x			x
19319	Wadden Sea of Schleswig-Holstein	1977	0.25	2	female
19320	Wadden Sea of Schleswig-Holstein	1977	3	2	female
19321	Wadden Sea of Schleswig-Holstein	1977	22	3	female
19322	Wadden Sea of Schleswig-Holstein	1977	0.25	2	female
19323	Wadden Sea of Schleswig-Holstein	1977	1.16667	2	female		x
19326	Wadden Sea of Schleswig-Holstein	1977	1.08333	2	male
19328	Wadden Sea of Schleswig-Holstein	1977	1.16667	2	male
19329	Wadden Sea of Schleswig-Holstein	1977	0.75	2	female
19330	Wadden Sea of Schleswig-Holstein	1977	1.16667	2	male
19331	Wadden Sea of Hamburg & Elbe Estuary	1977	18	3	female	x			x
19333	Wadden Sea of Schleswig-Holstein	1977	0.0576923	1	male
19335	Wadden Sea of Schleswig-Holstein	1977	0.25	2	female
19338	Wadden Sea of Schleswig-Holstein	1977	0.25	2	female
19340	Wadden Sea of Schleswig-Holstein	1977	0.25	2	female
19341	Wadden Sea of Schleswig-Holstein	1977	1.25	2	female
19342	Wadden Sea of Schleswig-Holstein	1977	0.25	2	male		x
19344	Wadden Sea of Schleswig-Holstein	1976	2	2	female
19345	Wadden Sea of Schleswig-Holstein	1976	3	2	female
19491	Wadden Sea of Schleswig-Holstein	1977	18	3	female
19492	Wadden Sea of Schleswig-Holstein	1977	16	3	female
19581	Wadden Sea of Schleswig-Holstein	1977	0.0833333	1	male
19585	Wadden Sea of Schleswig-Holstein	1978	0.583333	2	male
19883	Wadden Sea of Schleswig-Holstein	1978	14	3	female	x			x
20385	Wadden Sea of Hamburg & Elbe Estuary	1977	0.333333	2	male
21444	Wadden Sea of Schleswig-Holstein	1980	5	2	female
21460	Wadden Sea of Schleswig-Holstein	1980	0.0833333	1	female
21461	Wadden Sea of Schleswig-Holstein	1979	0.25	2	female
21499	Wadden Sea of Schleswig-Holstein	1979	0.0833333	1	female
21555	Wadden Sea of Schleswig-Holstein	1980	0.25	2	male
21576	Wadden Sea of Schleswig-Holstein	1978	0.0833333	1	male
21577	Wadden Sea of Schleswig-Holstein	1978	0.0833333	1	female	x
21578	Wadden Sea of Hamburg & Elbe Estuary	1978	0.166667	2	male
21579	Wadden Sea of Schleswig-Holstein	1978	0.0833333	1	male
21603	Wadden Sea of Schleswig-Holstein	1980	5	2	male
21659	Wadden Sea of Schleswig-Holstein	1980	0.333333	2	female
21978	Wadden Sea of Schleswig-Holstein	1979	0.666667	2	female
21980	Wadden Sea of Schleswig-Holstein	1981	1.66667	2	male
21985	Wadden Sea of Schleswig-Holstein	1981	1.08333	2	male
22041	Wadden Sea of Schleswig-Holstein	1981	13	3	male
22042	Wadden Sea of Schleswig-Holstein	1981	7	3	female
22043	Wadden Sea of Schleswig-Holstein	1981	14	3	female	x
22044	Wadden Sea of Schleswig-Holstein	1981	3	2	female
22046	Wadden Sea of Schleswig-Holstein	1981	3	2	female
22047	Wadden Sea of Schleswig-Holstein	1981	1.33333	2	male
22049	Wadden Sea of Schleswig-Holstein	1981	7	3	male
22082	Wadden Sea of Schleswig-Holstein	1981	0.583333	2	female
22083	Wadden Sea of Schleswig-Holstein	1981	4	2	male
22085	Wadden Sea of Schleswig-Holstein	1981	1.08333	2	male
22087	Wadden Sea of Schleswig-Holstein	1981	6	3	male
22088	Wadden Sea of Schleswig-Holstein	1981	3	2	male	x
22089	Wadden Sea of Schleswig-Holstein	1981	1.25	2	female
22092	Wadden Sea of Schleswig-Holstein	1981	2	2	male
22093	Wadden Sea of Schleswig-Holstein	1981	1.25	2	female
22094	Wadden Sea of Schleswig-Holstein	1981	1.25	2	female
22095	Wadden Sea of Schleswig-Holstein	1981	0.333333	2	female
22096	Wadden Sea of Schleswig-Holstein	1981	0.25	2	female
22097	Wadden Sea of Schleswig-Holstein	1989	0.333333	2	male
22098	Wadden Sea of Schleswig-Holstein	1981	0.25	2	female
22099	Wadden Sea of Schleswig-Holstein	1981	3	2	female		x
22100	Wadden Sea of Hamburg & Elbe Estuary	1989	0.333333	2	male
22102	Wadden Sea of Schleswig-Holstein	1981	0.25	2	female	x
22207	Wadden Sea of Schleswig-Holstein	1982	0.5	2	male
22289	Wadden Sea of Schleswig-Holstein	1980	0.166667	2	female
22297	Wadden Sea of Schleswig-Holstein	1978	2	2	male
22298	Wadden Sea of Schleswig-Holstein	1978	18	3	female	x
22704	Wadden Sea of Schleswig-Holstein	1982	5	2	female
22705	Wadden Sea of Schleswig-Holstein	1982	7	3	male
22706	Wadden Sea of Schleswig-Holstein	1982	6	3	female
22707	Wadden Sea of Schleswig-Holstein	1982	5	2	male
22813	Wadden Sea of Schleswig-Holstein	1982	2	2	female
22814	Wadden Sea of Schleswig-Holstein	1982	2	2	female
22815	Wadden Sea of Schleswig-Holstein	1982	0.166667	2	female
22816	Wadden Sea of Schleswig-Holstein	1982	0.25	2	female
22818	Wadden Sea of Schleswig-Holstein	1982	1.25	2	female
22820	Wadden Sea of Schleswig-Holstein	1982	0.25	2	male
22823	Wadden Sea of Schleswig-Holstein	1982	9	3	male	x
22824	Wadden Sea of Schleswig-Holstein	1981	1.25	2	male
22825	Wadden Sea of Schleswig-Holstein	1982	2	2	male
22827	Wadden Sea of Schleswig-Holstein	1982	1.25	2	female
22833	Wadden Sea of Schleswig-Holstein	1982	5	2	female
22835	Wadden Sea of Schleswig-Holstein	1982	8	3	male	x
22836	Wadden Sea of Schleswig-Holstein	1982	25	3	female	x
22837	Wadden Sea of Schleswig-Holstein	1982	6	3	male
22838	Wadden Sea of Schleswig-Holstein	1982	5	2	female	x
22855	Wadden Sea of Schleswig-Holstein	1982	15	3	female	x
22857	Wadden Sea of Schleswig-Holstein	1982	25	3	female	x			x
22858	Wadden Sea of Schleswig-Holstein	1984	0.25	2	female
22859	Wadden Sea of Schleswig-Holstein	1983	0.25	2	female
22860	Wadden Sea of Schleswig-Holstein	1982	0.0384615	1	male
22862	Wadden Sea of Schleswig-Holstein	1982	1	2	male
22864	Wadden Sea of Schleswig-Holstein	1982	0.0833333	1	male
22865	Wadden Sea of Schleswig-Holstein	1982	0.0833333	1	female
22869	Wadden Sea of Schleswig-Holstein	1982	1.08333	2	female
23130	Wadden Sea of Schleswig-Holstein	1982	1.33333	2	male
23713	Wadden Sea of Schleswig-Holstein	1983	14	3	male	x			x
23970	Wadden Sea of Schleswig-Holstein	1983	1	2	male
23971	Wadden Sea of Schleswig-Holstein	1983	2	2	female	x
23973	Wadden Sea of Schleswig-Holstein	1983	0.166667	2	male
23974	Wadden Sea of Schleswig-Holstein	1983	0.166667	2	male
23975	Wadden Sea of Schleswig-Holstein	1983	4	2	female
23976	Wadden Sea of Schleswig-Holstein	1987	0.166667	2	female
23977	Wadden Sea of Schleswig-Holstein	1983	10	3	female				x
23978	Wadden Sea of Schleswig-Holstein	1983	4	2	female
23980	Wadden Sea of Schleswig-Holstein	1983	3	2	male
24463	Wadden Sea of Lower Saxony	1983	15	3	female
24464	Wadden Sea of Lower Saxony	1983	5	2	male
24540	Wadden Sea of Schleswig-Holstein	1983	0.166667	2	female
24541	Wadden Sea of Schleswig-Holstein	1983	0.25	2	male
24622	Wadden Sea of Schleswig-Holstein	1983	7	3	female
24623	Wadden Sea of Schleswig-Holstein	1988	3	2	male
24624	Wadden Sea of Schleswig-Holstein	1983	0.25	2	male
24668	Wadden Sea of Hamburg & Elbe Estuary	1984	2	2	female
24805	Wadden Sea of Schleswig-Holstein	1983	0.333333	2	female	x
24806	Wadden Sea of Schleswig-Holstein	1983	2	2	female	x
24807	Wadden Sea of Schleswig-Holstein	1983	0.333333	2	male		x
24845	Wadden Sea of Schleswig-Holstein	1983	3	2	female		x
24882	Wadden Sea of Schleswig-Holstein	1984	14	3	female
24885	Wadden Sea of Schleswig-Holstein	1984	1	2	male	x
24886	Wadden Sea of Schleswig-Holstein	1984	2	2	female	x
24887	Wadden Sea of Schleswig-Holstein	1984	5	2	female
24889	Wadden Sea of Schleswig-Holstein	1984	0.0833333	1	male
24890	Wadden Sea of Schleswig-Holstein	1984	0.0833333	1	female
24951	Wadden Sea of Schleswig-Holstein	1986	0.0833333	1	female
25021	Wadden Sea of Schleswig-Holstein	1984	7	3	male				x
25022	Wadden Sea of Schleswig-Holstein	1984	14	3	male
25023	Wadden Sea of Schleswig-Holstein	1984	10	3	male	x
25026	Wadden Sea of Schleswig-Holstein	1984	1	2	female
25027	Wadden Sea of Schleswig-Holstein	1984	1.16667	2	female	x
25058	Wadden Sea of Schleswig-Holstein	1984	0.166667	2	male
25060	Wadden Sea of Schleswig-Holstein	1984	6	3	female
25065	Wadden Sea of Schleswig-Holstein	1994	9	3	male
25067	Wadden Sea of Schleswig-Holstein	1984	0.25	2	female		x
25068	Wadden Sea of Schleswig-Holstein	1984	6	3	female
25196	Wadden Sea of Schleswig-Holstein	1984	3	2	female
25197	Wadden Sea of Schleswig-Holstein	1984	10	3	female	x
25198	Wadden Sea of Schleswig-Holstein	1984	0.333333	2	female
25199	Wadden Sea of Schleswig-Holstein	1984	0.25	2	female
25277	Wadden Sea of Schleswig-Holstein	1966	9	3	female				x
25310	Wadden Sea of Schleswig-Holstein	1988	0.333333	2	female		x
25398	Wadden Sea of Schleswig-Holstein	1984	0.416667	2	male	x	x
25399	Wadden Sea of Schleswig-Holstein	1984	0.416667	2	female
25481	Wadden Sea of Schleswig-Holstein	1988	24	3	female				x
25618	Wadden Sea of Schleswig-Holstein	1985	0.0384615	1	male
25619	Wadden Sea of Schleswig-Holstein	1984	0.0384615	1	female
25620	Wadden Sea of Schleswig-Holstein	1985	0.0384615	1	male
25621	Wadden Sea of Schleswig-Holstein	1985	0.0384615	1	male
25660	Wadden Sea of Schleswig-Holstein	1985	0.0833333	1	female
25661	Wadden Sea of Schleswig-Holstein	1985	0.0833333	1	male
25662	Wadden Sea of Schleswig-Holstein	1985	0.0833333	1	male
25704	Wadden Sea of Schleswig-Holstein	1985	9	3	female
25705	Wadden Sea of Schleswig-Holstein	1985	6	3	male
25706	Wadden Sea of Schleswig-Holstein	1985	0.166667	2	female
25707	Wadden Sea of Schleswig-Holstein	1985	0.166667	2	male
25708	Wadden Sea of Schleswig-Holstein	1985	1.16667	2	female
25709	Wadden Sea of Schleswig-Holstein	1985	0.166667	2	male
25710	Wadden Sea of Schleswig-Holstein	1985	0.166667	2	female
25712	Wadden Sea of Schleswig-Holstein	1985	0.166667	2	male		x
25714	Wadden Sea of Schleswig-Holstein	1985	24	3	female	x			x
25715	Wadden Sea of Schleswig-Holstein	1983	1.08333	2	male
25718	Wadden Sea of Schleswig-Holstein	1985	0.0833333	1	female
25719	Wadden Sea of Schleswig-Holstein	1985	0.0833333	1	female
25721	Wadden Sea of Schleswig-Holstein	1985	0.0833333	1	male
25765	Wadden Sea of Schleswig-Holstein	1985	8	3	male
25770	Wadden Sea of Schleswig-Holstein	1985	12	3	female
26058	Wadden Sea of Schleswig-Holstein	1985	0.333333	2	female
26200	Wadden Sea of Schleswig-Holstein	1986	15	3	female				x
26215	Wadden Sea of Schleswig-Holstein	1986	0.75	2	female
26286	Wadden Sea of Schleswig-Holstein	1986	0.0384615	1	male
26287	Wadden Sea of Schleswig-Holstein	1986	0.0384615	1	female
26389	Wadden Sea of Schleswig-Holstein	1986	1.83333	2	female
26390	Wadden Sea of Schleswig-Holstein	1986	0.0384615	1	female	x
26392	Wadden Sea of Schleswig-Holstein	1986	0.0384615	1	male
26396	Wadden Sea of Schleswig-Holstein	1986	1.08333	2	male
26397	Wadden Sea of Schleswig-Holstein	1986	1	2	female
26398	Wadden Sea of Schleswig-Holstein	1986	0.0384615	1	female
26399	Wadden Sea of Schleswig-Holstein	1986	15	3	female	x
26441	Wadden Sea of Schleswig-Holstein	1986	24	3	male	x
26442	Wadden Sea of Schleswig-Holstein	1986	2	2	female	x
26443	Wadden Sea of Schleswig-Holstein	1986	0.0833333	1	male
26444	Wadden Sea of Schleswig-Holstein	1986	4	2	female
26477	Wadden Sea of Schleswig-Holstein	1986	7	3	male
26480	Wadden Sea of Schleswig-Holstein	1986	7	3	female
26482	Wadden Sea of Schleswig-Holstein	1986	12	3	female	x
26484	Wadden Sea of Schleswig-Holstein	1986	0.0384615	1	male
26485	Wadden Sea of Schleswig-Holstein	1986	0.0833333	1	male
26517	Wadden Sea of Schleswig-Holstein	1986	0.25	2	male
26595	Wadden Sea of Schleswig-Holstein	1986	9	3	female
26596	Wadden Sea of Hamburg & Elbe Estuary	1986	8	3	male
26597	Wadden Sea of Schleswig-Holstein	1986	16	3	female	x
26598	Wadden Sea of Schleswig-Holstein	1986	5	2	female
26604	Wadden Sea of Schleswig-Holstein	1986	12	3	female
26655	Wadden Sea of Schleswig-Holstein	1986	0.416667	2	male
27026	Wadden Sea of Schleswig-Holstein	1987	5	2	male	x		x	x
27027	Wadden Sea of Schleswig-Holstein	1987	1.5	2	female		x
27028	Wadden Sea of Schleswig-Holstein	1987	1.5	2	female
27179	Wadden Sea of Schleswig-Holstein	1987	0.0384615	1	male
27180	Wadden Sea of Schleswig-Holstein	1987	23	3	female
27181	Wadden Sea of Schleswig-Holstein	1987	5	2	male			x
27194	Wadden Sea of Schleswig-Holstein	1987	0.666667	2	male
27195	Wadden Sea of Schleswig-Holstein	1987	0.583333	2	female
27236	Wadden Sea of Schleswig-Holstein	1987	23	3	female
27237	Wadden Sea of Schleswig-Holstein	1987	5	2	male
27238	Wadden Sea of Schleswig-Holstein	1987	0.0192308	1	male
27239	Wadden Sea of Schleswig-Holstein	1987	1	2	female
27240	Wadden Sea of Schleswig-Holstein	1987	0.0384615	1	male
27241	Wadden Sea of Schleswig-Holstein	1987	0.833333	2	female
27243	Wadden Sea of Schleswig-Holstein	1987	0.0384615	1	male
27244	Wadden Sea of Schleswig-Holstein	1987	0.0384615	1	female
27245	Wadden Sea of Schleswig-Holstein	1987	0.0384615	1	male		x
27251	Wadden Sea of Schleswig-Holstein	1987	0.0384615	1	male		x
27283	Wadden Sea of Schleswig-Holstein	1987	13	3	female				x
27285	Wadden Sea of Schleswig-Holstein	1987	1	2	male
27286	Wadden Sea of Schleswig-Holstein	1987	0.0384615	1	male
27287	Wadden Sea of Schleswig-Holstein	1987	0.0384615	1	male
27288	Wadden Sea of Schleswig-Holstein	1987	0.0384615	1	male
27289	Wadden Sea of Schleswig-Holstein	1987	0.0384615	1	male	x
27290	Wadden Sea of Schleswig-Holstein	1987	0.0384615	1	male
27291	Wadden Sea of Schleswig-Holstein	1987	0.0833333	1	male	x	x
27292	Wadden Sea of Schleswig-Holstein	1987	0.0833333	1	male
27294	Wadden Sea of Schleswig-Holstein	1987	0.0833333	1	male
27296	Wadden Sea of Schleswig-Holstein	1987	22	3	female	x			x
27297	Wadden Sea of Schleswig-Holstein	1987	0.0833333	1	female
27298	Wadden Sea of Schleswig-Holstein	1987	0.0833333	1	female
27299	Wadden Sea of Schleswig-Holstein	1987	0.0833333	1	male
27302	Wadden Sea of Schleswig-Holstein	1987	0.0833333	1	female
27327	Wadden Sea of Schleswig-Holstein	1987	0.0384615	1	female
27328	Wadden Sea of Schleswig-Holstein	1987	4	2	male
27329	Wadden Sea of Schleswig-Holstein	1987	0.0833333	1	female
27330	Wadden Sea of Schleswig-Holstein	1987	0.0833333	1	female
27331	Wadden Sea of Schleswig-Holstein	1987	0.0833333	1	female
27332	Wadden Sea of Schleswig-Holstein	1987	0.0833333	1	female	x
27333	Wadden Sea of Schleswig-Holstein	1987	0.0833333	1	male
27334	Wadden Sea of Schleswig-Holstein	1987	0.0833333	1	female
27336	Wadden Sea of Schleswig-Holstein	1987	0.0833333	1	male
27338	Wadden Sea of Schleswig-Holstein	1987	0.0833333	1	female
27339	Wadden Sea of Schleswig-Holstein	1987	0.0833333	1	female
27341	Wadden Sea of Schleswig-Holstein	1987	0.0833333	1	female
27344	Wadden Sea of Schleswig-Holstein	1987	0.166667	2	male
27345	Wadden Sea of Schleswig-Holstein	1987	1.16667	2	male
27347	Wadden Sea of Schleswig-Holstein	1987	0.166667	2	female
27348	Wadden Sea of Schleswig-Holstein	1987	0.166667	2	male
27375	Wadden Sea of Schleswig-Holstein	1987	0.0384615	1	male
27376	Wadden Sea of Schleswig-Holstein	1987	0.0833333	1	male
27378	Wadden Sea of Schleswig-Holstein	1987	0.0833333	1	male
27379	Wadden Sea of Schleswig-Holstein	1987	0.115385	2	male
27380	Wadden Sea of Schleswig-Holstein	1987	0.166667	2	male
27384	Wadden Sea of Schleswig-Holstein	1987	14	3	male	x		x	x
27385	Wadden Sea of Schleswig-Holstein	1987	25	3	female	x			x
27431	Wadden Sea of Schleswig-Holstein	1987	18	3	female
27433	Wadden Sea of Schleswig-Holstein	1987	7	3	female				x
27459	Wadden Sea of Schleswig-Holstein	1987	9	3	male	x			x
27460	Wadden Sea of Schleswig-Holstein	1988	0.583333	2	female		x
27461	Wadden Sea of Schleswig-Holstein	1988	0.5	2	male
27462	Wadden Sea of Schleswig-Holstein	1987	3	2	female
27532	Wadden Sea of Schleswig-Holstein	1988	12	3	female	x
27533	Wadden Sea of Schleswig-Holstein	1988	6	3	male
27584	Wadden Sea of Schleswig-Holstein	1988	0.75	2	male
27585	Wadden Sea of Schleswig-Holstein	1988	0.666667	2	female
27586	Wadden Sea of Schleswig-Holstein	1988	0.75	2	male
27587	Wadden Sea of Schleswig-Holstein	1988	0.666667	2	female
27588	Wadden Sea of Schleswig-Holstein	1988	12	3	female	x
27589	Wadden Sea of Schleswig-Holstein	1988	0.75	2	male
27590	Wadden Sea of Schleswig-Holstein	1980	0.666667	2	male
27591	Wadden Sea of Schleswig-Holstein	1988	0.666667	2	male
27592	Wadden Sea of Schleswig-Holstein	1988	13	3	female
27645	Wadden Sea of Schleswig-Holstein	1988	14	3	male	x
27646	Wadden Sea of Schleswig-Holstein	1988	0.916667	2	male
27647	Wadden Sea of Schleswig-Holstein	1988	0.916667	2	female
27648	Wadden Sea of Schleswig-Holstein	1988	12	3	female	x		x
27649	Wadden Sea of Schleswig-Holstein	1988	15	3	female	x
27650	Wadden Sea of Schleswig-Holstein	1988	24	3	male	x		x
27651	Wadden Sea of Schleswig-Holstein	1988	0.916667	2	female
27652	Wadden Sea of Schleswig-Holstein	1988	0.916667	2	male
27653	Wadden Sea of Schleswig-Holstein	1988	0.916667	2	male
27654	Wadden Sea of Schleswig-Holstein	1988	0.833333	2	male
27655	Wadden Sea of Schleswig-Holstein	1988	3	2	female
27657	Wadden Sea of Schleswig-Holstein	1988	8	3	female
27660	Wadden Sea of Schleswig-Holstein	1988	0.916667	2	male
27663	Wadden Sea of Schleswig-Holstein	1988	14	3	female
27667	Wadden Sea of Schleswig-Holstein	1988	8	3	female	x
27668	Wadden Sea of Schleswig-Holstein	1988	12	3	male
27669	Wadden Sea of Schleswig-Holstein	1988	22	3	female	x			x
27670	Wadden Sea of Schleswig-Holstein	1988	9	3	male		x
27671	Wadden Sea of Schleswig-Holstein	1988	24	3	female	x			x
27672	Wadden Sea of Schleswig-Holstein	1988	1.91667	2	male
27673	Wadden Sea of Schleswig-Holstein	1988	16	3	male	x			x
27674	Wadden Sea of Schleswig-Holstein	1988	1.91667	2	female
27675	Wadden Sea of Schleswig-Holstein	1988	0.916667	2	female
27676	Wadden Sea of Schleswig-Holstein	1988	0.916667	2	male
27677	Wadden Sea of Schleswig-Holstein	1988	0.916667	2	male
27678	Wadden Sea of Schleswig-Holstein	1988	0.833333	2	female			x
27679	Wadden Sea of Schleswig-Holstein	1988	0.833333	2	female
27680	Wadden Sea of Schleswig-Holstein	1988	0.833333	2	female
27681	Wadden Sea of Schleswig-Holstein	1988	0.833333	2	male
27697	Wadden Sea of Schleswig-Holstein	1988	15	3	female
27704	Wadden Sea of Schleswig-Holstein	1988	0.666667	2	female
27705	Wadden Sea of Schleswig-Holstein	1988	0.666667	2	female
27706	Wadden Sea of Schleswig-Holstein	1988	0.666667	2	male
27707	Wadden Sea of Schleswig-Holstein	1987	8	3	female
27708	Wadden Sea of Schleswig-Holstein	1988	2	2	male
27709	Wadden Sea of Schleswig-Holstein	1988	0.916667	2	male
27710	Wadden Sea of Schleswig-Holstein	1988	0.916667	2	female
27711	Wadden Sea of Schleswig-Holstein	1988	0.916667	2	male
27713	Wadden Sea of Schleswig-Holstein	1988	0.916667	2	male
27714	Wadden Sea of Schleswig-Holstein	1988	0.833333	2	female
27715	Wadden Sea of Schleswig-Holstein	1988	0.916667	2	female
27716	Wadden Sea of Schleswig-Holstein	1988	0.833333	2	female	x
27717	Wadden Sea of Schleswig-Holstein	1988	0.916667	2	female
27718	Wadden Sea of Schleswig-Holstein	1988	0.833333	2	male
27719	Wadden Sea of Schleswig-Holstein	1988	0.833333	2	female
27720	Wadden Sea of Schleswig-Holstein	1988	1.83333	2	male
27721	Wadden Sea of Schleswig-Holstein	1988	0.916667	2	male
27722	Wadden Sea of Schleswig-Holstein	1988	0.833333	2	female
27723	Wadden Sea of Schleswig-Holstein	1988	12	3	female
27724	Wadden Sea of Schleswig-Holstein	1988	8	3	male
27725	Wadden Sea of Schleswig-Holstein	1988	0.916667	2	female	x
27726	Wadden Sea of Schleswig-Holstein	1988	0.916667	2	female
27729	Wadden Sea of Schleswig-Holstein	1988	9	3	male	x
27730	Wadden Sea of Schleswig-Holstein	1988	3	2	female
27731	Wadden Sea of Schleswig-Holstein	1988	0.916667	2	male
27732	Wadden Sea of Schleswig-Holstein	1988	0.916667	2	female
27751	Wadden Sea of Schleswig-Holstein	1988	9	3	female
27759	Wadden Sea of Schleswig-Holstein	1988	6	3	female
27760	Wadden Sea of Schleswig-Holstein	1988	8	3	male
27761	Wadden Sea of Schleswig-Holstein	1988	25	3	male			x	x
27763	Wadden Sea of Schleswig-Holstein	1988	1.91667	2	male
27764	Wadden Sea of Schleswig-Holstein	1988	22	3	male	x		x
27765	Wadden Sea of Schleswig-Holstein	1988	1.91667	2	male
27766	Wadden Sea of Schleswig-Holstein	1988	0.916667	2	male
27769	Wadden Sea of Schleswig-Holstein	1988	0.916667	2	male
27770	Wadden Sea of Schleswig-Holstein	1988	0.916667	2	female
27771	Wadden Sea of Schleswig-Holstein	1988	2	2	female
27772	Wadden Sea of Schleswig-Holstein	1988	1	2	female
27773	Wadden Sea of Schleswig-Holstein	1988	0.916667	2	male
27774	Wadden Sea of Schleswig-Holstein	1988	1	2	male
27775	Wadden Sea of Schleswig-Holstein	1988	15	3	female	x
27776	Wadden Sea of Schleswig-Holstein	1988	0.916667	2	female
27778	Wadden Sea of Schleswig-Holstein	1988	4	2	female
27780	Wadden Sea of Schleswig-Holstein	1988	6	3	female		x
27781	Wadden Sea of Schleswig-Holstein	1988	3	2	male
27783	Wadden Sea of Schleswig-Holstein	1988	1.91667	2	female
27784	Wadden Sea of Schleswig-Holstein	1988	1.91667	2	male
27785	Wadden Sea of Schleswig-Holstein	1988	1.91667	2	male
27787	Wadden Sea of Schleswig-Holstein	1988	3	2	female
27788	Wadden Sea of Schleswig-Holstein	1988	4	2	female		x
27801	Wadden Sea of Schleswig-Holstein	1988	7	3	female
27802	Wadden Sea of Schleswig-Holstein	1988	3	2	male
27803	Wadden Sea of Schleswig-Holstein	1988	12	3	female
27804	Wadden Sea of Schleswig-Holstein	1988	2	2	male
27806	Wadden Sea of Schleswig-Holstein	1988	6	3	female
27806	Wadden Sea of Schleswig-Holstein	1988	14	3	female
27807	Wadden Sea of Schleswig-Holstein	1988	5	2	female
27808	Wadden Sea of Schleswig-Holstein	1988	18	3	female	x
27809	Wadden Sea of Schleswig-Holstein	1988	2	2	female
27810	Wadden Sea of Schleswig-Holstein	1988	2	2	male
27811	Wadden Sea of Schleswig-Holstein	1988	2	2	female
27812	Wadden Sea of Schleswig-Holstein	1988	14	3	female	x
27813	Wadden Sea of Schleswig-Holstein	1988	1.08333	2	female
27814	Wadden Sea of Schleswig-Holstein	1988	1.91667	2	male
27816	Wadden Sea of Schleswig-Holstein	1988	0.916667	2	female
27816	Wadden Sea of Schleswig-Holstein	1988	4	2	male
27828	Wadden Sea of Schleswig-Holstein	1988	0.916667	2	female
27830	Wadden Sea of Schleswig-Holstein	1988	0.916667	2	male
27831	Wadden Sea of Schleswig-Holstein	1988	0.916667	2	male	x
27832	Wadden Sea of Schleswig-Holstein	1988	1.91667	2	female
27833	Wadden Sea of Schleswig-Holstein	1988	13	3	male	x			x
27834	Wadden Sea of Schleswig-Holstein	1988	8	3	male				x
27835	Wadden Sea of Schleswig-Holstein	1988	0.916667	2	female
27838	Wadden Sea of Schleswig-Holstein	1988	4	2	female
27839	Wadden Sea of Schleswig-Holstein	1988	7	3	male
27841	Wadden Sea of Schleswig-Holstein	1988	0.916667	2	male
27842	Wadden Sea of Schleswig-Holstein	1988	1.91667	2	male
27843	Wadden Sea of Schleswig-Holstein	1988	0.916667	2	female
27844	Wadden Sea of Schleswig-Holstein	1988	8	3	female				x
27845	Wadden Sea of Schleswig-Holstein	1988	2	2	female
27846	Wadden Sea of Schleswig-Holstein	1988	10	3	male	x
27847	Wadden Sea of Schleswig-Holstein	1988	8	3	female
27848	Wadden Sea of Schleswig-Holstein	1988	5	2	female	x
27849	Wadden Sea of Schleswig-Holstein	1988	23	3	female	x			x
27850	Wadden Sea of Schleswig-Holstein	1988	14	3	female
27852	Wadden Sea of Schleswig-Holstein	1988	1	2	male
27853	Wadden Sea of Schleswig-Holstein	1988	6	3	female
27854	Wadden Sea of Schleswig-Holstein	1988	12	3	female	x			x
27855	Wadden Sea of Schleswig-Holstein	1988	0.916667	2	male
27856	Wadden Sea of Schleswig-Holstein	1988	1	2	female
27857	Wadden Sea of Schleswig-Holstein	1988	1	2	male
27858	Wadden Sea of Schleswig-Holstein	1988	0.916667	2	male
27859	Wadden Sea of Schleswig-Holstein	1988	1	2	female
27860	Wadden Sea of Schleswig-Holstein	1988	2	2	male
27861	Wadden Sea of Schleswig-Holstein	1988	0.916667	2	female
27862	Wadden Sea of Schleswig-Holstein	1988	8	3	female
27863	Wadden Sea of Schleswig-Holstein	1988	0.916667	2	male
27863	Wadden Sea of Schleswig-Holstein	1988	2	2	male
27864	Wadden Sea of Schleswig-Holstein	1988	0.916667	2	male
27865	Wadden Sea of Schleswig-Holstein	1988	0.916667	2	female
27866	Wadden Sea of Schleswig-Holstein	1988	1	2	male
27868	Wadden Sea of Schleswig-Holstein	1988	0.916667	2	female
27869	Wadden Sea of Schleswig-Holstein	1988	1.91667	2	female
27870	Wadden Sea of Schleswig-Holstein	1988	3	2	male
27871	Wadden Sea of Schleswig-Holstein	1988	18	3	male	x			x
27899	Wadden Sea of Schleswig-Holstein	1988	6	3	male
27900	Wadden Sea of Schleswig-Holstein	1988	10	3	male
27901	Wadden Sea of Schleswig-Holstein	1988	3	2	male
27902	Wadden Sea of Schleswig-Holstein	1988	20	3	female	x
27903	Wadden Sea of Schleswig-Holstein	1988	0.916667	2	male
27904	Wadden Sea of Schleswig-Holstein	1988	0.916667	2	male
27905	Wadden Sea of Schleswig-Holstein	1988	1.91667	2	female
27906	Wadden Sea of Schleswig-Holstein	1988	3	2	male
27907	Wadden Sea of Schleswig-Holstein	1988	5	2	female
27908	Wadden Sea of Schleswig-Holstein	1988	6	3	male	x
27909	Wadden Sea of Schleswig-Holstein	1988	4	2	female
27910	Wadden Sea of Schleswig-Holstein	1988	0.916667	2	female
27911	Wadden Sea of Schleswig-Holstein	1988	0.916667	2	female
27912	Wadden Sea of Schleswig-Holstein	1988	22	3	female				x
27913	Wadden Sea of Schleswig-Holstein	1988	16	3	female
27916	Wadden Sea of Schleswig-Holstein	1988	0.916667	2	female
27917	Wadden Sea of Schleswig-Holstein	1988	5	2	male
27918	Wadden Sea of Schleswig-Holstein	1988	1	2	male
27919	Wadden Sea of Schleswig-Holstein	1988	2	2	male
27920	Wadden Sea of Schleswig-Holstein	1988	1	2	female
27921	Wadden Sea of Schleswig-Holstein	1988	1	2	male
27922	Wadden Sea of Schleswig-Holstein	1988	6	3	female
27923	Wadden Sea of Schleswig-Holstein	1988	16	3	female	x
27924	Wadden Sea of Schleswig-Holstein	1988	2	2	male
27926	Wadden Sea of Schleswig-Holstein	1988	0.916667	2	male
27927	Wadden Sea of Schleswig-Holstein	1988	1.91667	2	female
27928	Wadden Sea of Schleswig-Holstein	1988	3	2	male
27930	Wadden Sea of Schleswig-Holstein	1988	0.916667	2	female
27932	Wadden Sea of Schleswig-Holstein	1988	25	3	male	x			x
27933	Wadden Sea of Schleswig-Holstein	1988	4	2	female
27941	Wadden Sea of Schleswig-Holstein	1988	10	3	male
27942	Wadden Sea of Schleswig-Holstein	1988	8	3	female
27943	Wadden Sea of Schleswig-Holstein	1988	7	3	female
27944	Wadden Sea of Schleswig-Holstein	1988	2	2	male
27945	Wadden Sea of Schleswig-Holstein	1988	14	3	female
27946	Wadden Sea of Schleswig-Holstein	1988	3	2	female
27947	Wadden Sea of Schleswig-Holstein	1988	7	3	female	x
27948	Wadden Sea of Schleswig-Holstein	1988	1.16667	2	female
27949	Wadden Sea of Schleswig-Holstein	1988	12	3	female
27950	Wadden Sea of Schleswig-Holstein	1988	12	3	female
27951	Wadden Sea of Schleswig-Holstein	1988	8	3	male
27952	Wadden Sea of Schleswig-Holstein	1988	5	2	female
27953	Wadden Sea of Schleswig-Holstein	1988	2	2	male
27954	Wadden Sea of Schleswig-Holstein	1988	4	2	female
27955	Wadden Sea of Schleswig-Holstein	1988	3	2	male
27956	Wadden Sea of Schleswig-Holstein	1988	8	3	female
27957	Wadden Sea of Schleswig-Holstein	1988	4	2	female
27958	Wadden Sea of Schleswig-Holstein	1988	3	2	male
27959	Wadden Sea of Schleswig-Holstein	1988	2	2	male
27961	Wadden Sea of Schleswig-Holstein	1988	3	2	male
27962	Wadden Sea of Schleswig-Holstein	1988	3	2	male
27963	Wadden Sea of Schleswig-Holstein	1988	0.916667	2	female
27964	Wadden Sea of Schleswig-Holstein	1988	1.91667	2	female
27965	Wadden Sea of Schleswig-Holstein	1988	23	3	male	x
27966	Wadden Sea of Schleswig-Holstein	1988	2	2	male
27967	Wadden Sea of Schleswig-Holstein	1988	0.916667	2	female
27968	Wadden Sea of Schleswig-Holstein	1988	11	3	female		x
27969	Wadden Sea of Schleswig-Holstein	1988	0.916667	2	male
27970	Wadden Sea of Schleswig-Holstein	1988	1.91667	2	female
27971	Wadden Sea of Schleswig-Holstein	1988	0.916667	2	male
27972	Wadden Sea of Schleswig-Holstein	1988	6	3	male
27973	North Sea	1988	1.08333	2	male
27975	Wadden Sea of Schleswig-Holstein	1988	8	3	male
27976	Wadden Sea of Schleswig-Holstein	1988	2	2	female
27989	Wadden Sea of Schleswig-Holstein	1988	4	2	female
27990	Wadden Sea of Schleswig-Holstein	1988	1	2	female
27991	Wadden Sea of Schleswig-Holstein	1988	2	2	male
27992	Wadden Sea of Schleswig-Holstein	1988	22	3	female	x
27993	Wadden Sea of Schleswig-Holstein	1988	1	2	male
27994	Wadden Sea of Schleswig-Holstein	1988	1	2	male
27995	Wadden Sea of Schleswig-Holstein	1988	1	2	male
27996	Wadden Sea of Schleswig-Holstein	1988	1	2	male
27997	Wadden Sea of Schleswig-Holstein	1988	1	2	male
27999	Wadden Sea of Schleswig-Holstein	1988	1	2	female
28000	Wadden Sea of Schleswig-Holstein	1988	2	2	female
28002	Wadden Sea of Schleswig-Holstein	1988	2	2	male
28003	Wadden Sea of Schleswig-Holstein	1988	2	2	male
28004	Wadden Sea of Schleswig-Holstein	1988	1	2	male
28006	Wadden Sea of Schleswig-Holstein	1988	3	2	female
28007	Wadden Sea of Schleswig-Holstein	1988	8	3	female
28008	Wadden Sea of Schleswig-Holstein	1988	5	2	female
28009	Wadden Sea of Schleswig-Holstein	1988	9	3	female	x
28010	Wadden Sea of Schleswig-Holstein	1988	2	2	male
28011	Wadden Sea of Schleswig-Holstein	1988	1	2	male
28012	Wadden Sea of Schleswig-Holstein	1988	1	2	female
28013	Wadden Sea of Schleswig-Holstein	1988	2	2	male
28014	Wadden Sea of Schleswig-Holstein	1988	1	2	female
28015	Wadden Sea of Schleswig-Holstein	1988	1	2	female	x
28026	Wadden Sea of Schleswig-Holstein	1988	17	3	female	x			x
28027	Wadden Sea of Schleswig-Holstein	1988	9	3	male	x
28028	Wadden Sea of Schleswig-Holstein	1988	8	3	female
28029	Wadden Sea of Schleswig-Holstein	1988	12	3	female
28030	Wadden Sea of Schleswig-Holstein	1988	25	3	female	x
28032	Wadden Sea of Schleswig-Holstein	1988	10	3	female	x		x	x
28033	Wadden Sea of Schleswig-Holstein	1988	17	3	female
28034	Wadden Sea of Schleswig-Holstein	1988	1	2	female
28035	Wadden Sea of Schleswig-Holstein	1988	1	2	female
28036	Wadden Sea of Schleswig-Holstein	1988	1	2	male
28037	Wadden Sea of Schleswig-Holstein	1988	1	2	male
28038	Wadden Sea of Schleswig-Holstein	1988	2	2	female
28040	Wadden Sea of Schleswig-Holstein	1988	2	2	male
28041	Wadden Sea of Schleswig-Holstein	1988	1	2	female
28042	Wadden Sea of Schleswig-Holstein	1988	4	2	male
28043	Wadden Sea of Schleswig-Holstein	1988	1	2	female
28044	Wadden Sea of Schleswig-Holstein	1988	1.08333	2	female	x
28045	Wadden Sea of Schleswig-Holstein	1988	5	2	female			x	x
28046	Wadden Sea of Schleswig-Holstein	1988	4	2	male
28047	Wadden Sea of Schleswig-Holstein	1988	7	3	male
28048	Wadden Sea of Schleswig-Holstein	1988	2	2	male
28049	Wadden Sea of Schleswig-Holstein	1988	8	3	male
28050	Wadden Sea of Schleswig-Holstein	1988	2	2	male
28051	Wadden Sea of Schleswig-Holstein	1988	5	2	female		x
28052	Wadden Sea of Schleswig-Holstein	1988	5	2	male
28053	Wadden Sea of Schleswig-Holstein	1988	8	3	male
28054	Wadden Sea of Schleswig-Holstein	1977	24	3	male				x
28055	Wadden Sea of Schleswig-Holstein	1988	4	2	male
28056	Wadden Sea of Schleswig-Holstein	1988	1	2	male
28057	Wadden Sea of Schleswig-Holstein	1988	1	2	male
28058	Wadden Sea of Schleswig-Holstein	1988	6	3	female
28059	Wadden Sea of Schleswig-Holstein	1988	1	2	male
28060	Wadden Sea of Schleswig-Holstein	1988	9	3	female
28061	Wadden Sea of Schleswig-Holstein	1988	4	2	male
28062	Wadden Sea of Schleswig-Holstein	1988	10	3	male	x			x
28063	Wadden Sea of Schleswig-Holstein	1988	3	2	female
28065	Wadden Sea of Schleswig-Holstein	1988	8	3	male				x
28066	Wadden Sea of Schleswig-Holstein	1988	5	2	male			x
28068	Wadden Sea of Schleswig-Holstein	1988	1	2	female
28069	Wadden Sea of Schleswig-Holstein	1988	1	2	female
28070	Wadden Sea of Schleswig-Holstein	1988	2	2	male
28071	Wadden Sea of Schleswig-Holstein	1988	2	2	male
28073	Wadden Sea of Schleswig-Holstein	1988	7	3	male
28074	Wadden Sea of Schleswig-Holstein	1988	12	3	male	x
28075	Wadden Sea of Schleswig-Holstein	1988	6	3	male			x
28077	Wadden Sea of Schleswig-Holstein	1988	2	2	female
28078	Wadden Sea of Schleswig-Holstein	1988	1	2	male
28101	Wadden Sea of Schleswig-Holstein	1988	2	2	male
28102	Wadden Sea of Schleswig-Holstein	1988	12	3	male	x
28103	Wadden Sea of Schleswig-Holstein	1988	4	2	male	x
28104	Wadden Sea of Schleswig-Holstein	1988	22	3	female	x		x	x
28105	Wadden Sea of Schleswig-Holstein	1988	16	3	male
28106	Wadden Sea of Schleswig-Holstein	1988	12	3	male
28107	Wadden Sea of Schleswig-Holstein	1988	10	3	male
28108	Wadden Sea of Schleswig-Holstein	1988	10	3	male
28109	Wadden Sea of Schleswig-Holstein	1988	4	2	female		x
28110	Wadden Sea of Schleswig-Holstein	1988	8	3	female	x
28111	Wadden Sea of Schleswig-Holstein	1988	8	3	female
28112	Wadden Sea of Schleswig-Holstein	1988	2	2	male
28167	Wadden Sea of Schleswig-Holstein	1988	0.833333	2	female
28168	Wadden Sea of Schleswig-Holstein	1988	22	3	male	x			x
28169	Wadden Sea of Schleswig-Holstein	1988	3	2	male
28170	Wadden Sea of Schleswig-Holstein	1988	1	2	male	x
28171	Wadden Sea of Schleswig-Holstein	1988	9	3	female
28172	Wadden Sea of Schleswig-Holstein	1988	22	3	female	x
28174	Wadden Sea of Schleswig-Holstein	1988	1	2	male
28175	Wadden Sea of Schleswig-Holstein	1988	7	3	female
28176	Wadden Sea of Schleswig-Holstein	1988	25	3	female	x			x
28176	Wadden Sea of Schleswig-Holstein	1988	12	3	female
28177	Wadden Sea of Schleswig-Holstein	1988	1.08333	2	female
28178	Wadden Sea of Schleswig-Holstein	1988	2	2	female
28179	Wadden Sea of Schleswig-Holstein	1988	2	2	female
28180	Wadden Sea of Schleswig-Holstein	1988	1.08333	2	male
28181	Wadden Sea of Schleswig-Holstein	1988	2	2	male
28182	Wadden Sea of Schleswig-Holstein	1988	5	2	female
28183	Wadden Sea of Schleswig-Holstein	1988	4	2	female
28184	Wadden Sea of Schleswig-Holstein	1988	10	3	male
28185	Wadden Sea of Schleswig-Holstein	1988	15	3	female	x
28186	Wadden Sea of Schleswig-Holstein	1988	2	2	female
28187	Wadden Sea of Schleswig-Holstein	1988	13	3	female
28188	Wadden Sea of Schleswig-Holstein	1988	12	3	male	x
28189	Wadden Sea of Schleswig-Holstein	1988	24	3	female	x			x
28190	Wadden Sea of Schleswig-Holstein	1988	6	3	female
28191	Wadden Sea of Schleswig-Holstein	1988	3	2	male
28192	Wadden Sea of Hamburg & Elbe Estuary	1988	10	3	male	x			x
28193	Wadden Sea of Schleswig-Holstein	1988	13	3	male	x			x
28194	Wadden Sea of Schleswig-Holstein	1988	1.25	2	female
28195	Wadden Sea of Schleswig-Holstein	1988	6	3	male
28196	Wadden Sea of Schleswig-Holstein	1988	12	3	female
28198	Wadden Sea of Schleswig-Holstein	1988	6	3	female
28200	Wadden Sea of Schleswig-Holstein	1988	7	3	female
28201	Wadden Sea of Schleswig-Holstein	1988	22	3	female	x			x
28201	Wadden Sea of Schleswig-Holstein	1988	7	3	male
28202	Wadden Sea of Schleswig-Holstein	1988	7	3	male
28203	Wadden Sea of Schleswig-Holstein	1988	8	3	female
28204	Wadden Sea of Schleswig-Holstein	1988	8	3	male
28205	Wadden Sea of Schleswig-Holstein	1988	10	3	female
28206	Wadden Sea of Schleswig-Holstein	1988	9	3	female
28207	Wadden Sea of Schleswig-Holstein	1988	5	2	female
28208	Wadden Sea of Schleswig-Holstein	1988	9	3	male
28209	Wadden Sea of Schleswig-Holstein	1988	6	3	female
28210	Wadden Sea of Schleswig-Holstein	1988	15	3	female
28212	Wadden Sea of Schleswig-Holstein	1988	5	2	male
28213	Wadden Sea of Schleswig-Holstein	1988	5	2	female
28214	Wadden Sea of Schleswig-Holstein	1988	6	3	female
28268	Wadden Sea of Schleswig-Holstein	1988	14	3	male
28269	Wadden Sea of Schleswig-Holstein	1988	6	3	female
28270	Wadden Sea of Schleswig-Holstein	1988	7	3	male
28272	Wadden Sea of Schleswig-Holstein	1988	12	3	female
28273	Wadden Sea of Schleswig-Holstein	1988	12	3	male	x
28274	Wadden Sea of Schleswig-Holstein	1988	6	3	male	x
28275	Wadden Sea of Schleswig-Holstein	1988	4	2	female
28276	Wadden Sea of Schleswig-Holstein	1988	3	2	female
28277	Wadden Sea of Schleswig-Holstein	1988	9	3	male
28278	Wadden Sea of Schleswig-Holstein	1988	2	2	male
28279	Wadden Sea of Schleswig-Holstein	1988	7	3	female	x
28281	Wadden Sea of Schleswig-Holstein	1988	5	2	male
28282	Wadden Sea of Schleswig-Holstein	1988	6	3	female
28283	Wadden Sea of Schleswig-Holstein	1988	3	2	female
28284	Wadden Sea of Schleswig-Holstein	1988	9	3	female	x
28285	Wadden Sea of Schleswig-Holstein	1988	12	3	female				x
28286	Wadden Sea of Schleswig-Holstein	1988	10	3	male
28287	Wadden Sea of Schleswig-Holstein	1988	17	3	female	x
28288	Wadden Sea of Schleswig-Holstein	1988	16	3	male	x			x
28290	Wadden Sea of Schleswig-Holstein	1988	3	2	male
28292	Wadden Sea of Schleswig-Holstein	1988	6	3	male
28293	Wadden Sea of Schleswig-Holstein	1988	13	3	female
28294	Wadden Sea of Schleswig-Holstein	1988	2	2	female
28295	Wadden Sea of Schleswig-Holstein	1988	6	3	male
28296	Wadden Sea of Schleswig-Holstein	1988	11	3	male
28298	Wadden Sea of Schleswig-Holstein	1988	8	3	male
28299	Wadden Sea of Schleswig-Holstein	1988	2	2	male
28300	Wadden Sea of Schleswig-Holstein	1988	2	2	male
28301	Wadden Sea of Schleswig-Holstein	1988	1	2	male
28302	Wadden Sea of Schleswig-Holstein	1988	2	2	female
28304	Wadden Sea of Schleswig-Holstein	1988	14	3	female				x
28305	Wadden Sea of Schleswig-Holstein	1988	2	2	male
28320	Wadden Sea of Schleswig-Holstein	1988	25	3	female
28321	Wadden Sea of Schleswig-Holstein	1988	12	3	male	x		x
28322	Wadden Sea of Schleswig-Holstein	1988	6	3	male
28323	Wadden Sea of Schleswig-Holstein	1988	3	2	male
28324	Wadden Sea of Schleswig-Holstein	1988	4	2	female
28325	Wadden Sea of Schleswig-Holstein	1988	12	3	female
28326	Wadden Sea of Schleswig-Holstein	1988	6	3	female
28327	Wadden Sea of Schleswig-Holstein	1988	10	3	female
28328	Wadden Sea of Schleswig-Holstein	1988	10	3	male	x
28329	Wadden Sea of Schleswig-Holstein	1988	5	2	male
28330	Wadden Sea of Schleswig-Holstein	1988	6	3	male
28331	Wadden Sea of Schleswig-Holstein	1988	12	3	female
28332	Wadden Sea of Schleswig-Holstein	1988	7	3	female
28333	Wadden Sea of Schleswig-Holstein	1988	11	3	female
28335	Wadden Sea of Schleswig-Holstein	1988	5	2	female
28336	Wadden Sea of Schleswig-Holstein	1988	7	3	male
28337	Wadden Sea of Schleswig-Holstein	1988	12	3	female				x
28338	Wadden Sea of Schleswig-Holstein	1988	5	2	male
28340	Wadden Sea of Schleswig-Holstein	1988	10	3	female	x
28341	Wadden Sea of Schleswig-Holstein	1988	2	2	male	x
28342	Wadden Sea of Schleswig-Holstein	1988	6	3	female
28343	Wadden Sea of Schleswig-Holstein	1988	13	3	male		x
28344	Wadden Sea of Schleswig-Holstein	1988	10	3	male	x
28345	Wadden Sea of Schleswig-Holstein	1988	18	3	male	x
28346	Wadden Sea of Schleswig-Holstein	1988	9	3	female
28347	Wadden Sea of Schleswig-Holstein	1988	13	3	male	x
28348	Wadden Sea of Schleswig-Holstein	1988	10	3	male	x
28349	Wadden Sea of Schleswig-Holstein	1988	4	2	female
28350	Wadden Sea of Schleswig-Holstein	1988	11	3	female
28351	Wadden Sea of Schleswig-Holstein	1988	15	3	female	x
28352	Wadden Sea of Schleswig-Holstein	1988	9	3	female	x
28353	Wadden Sea of Schleswig-Holstein	1988	11	3	male
28354	Wadden Sea of Schleswig-Holstein	1988	5	2	female
28355	Wadden Sea of Schleswig-Holstein	1988	4	2	female
28356	Wadden Sea of Schleswig-Holstein	1988	14	3	male	x
28357	Wadden Sea of Schleswig-Holstein	1988	2	2	female		x
28358	Wadden Sea of Schleswig-Holstein	1988	11	3	female
28359	Wadden Sea of Schleswig-Holstein	1988	6	3	female
28361	Wadden Sea of Schleswig-Holstein	1988	9	3	female
28362	Wadden Sea of Schleswig-Holstein	1988	13	3	male
28363	Wadden Sea of Schleswig-Holstein	1988	17	3	female
28364	Wadden Sea of Schleswig-Holstein	1988	10	3	male
28365	Wadden Sea of Schleswig-Holstein	1988	2	2	male
28366	Wadden Sea of Schleswig-Holstein	1988	6	3	male
28367	Wadden Sea of Schleswig-Holstein	1988	24	3	female
28368	Wadden Sea of Schleswig-Holstein	1988	7	3	male
28382	Wadden Sea of Schleswig-Holstein	1988	10	3	female
28383	Wadden Sea of Schleswig-Holstein	1988	23	3	female
28384	Wadden Sea of Schleswig-Holstein	1988	3	2	male
28385	Wadden Sea of Schleswig-Holstein	1988	17	3	female	x			x
28387	Wadden Sea of Schleswig-Holstein	1988	2	2	female
28389	Wadden Sea of Schleswig-Holstein	1988	11	3	female	x
28390	Wadden Sea of Schleswig-Holstein	1988	18	3	female	x
28391	Wadden Sea of Schleswig-Holstein	1988	9	3	male
28392	Wadden Sea of Schleswig-Holstein	1988	1.08333	2	male
28393	Wadden Sea of Schleswig-Holstein	1988	12	3	female
28394	Wadden Sea of Schleswig-Holstein	1988	12	3	female
28395	Wadden Sea of Schleswig-Holstein	1988	8	3	female	x
28396	Wadden Sea of Schleswig-Holstein	1988	18	3	female				x
28396	Wadden Sea of Schleswig-Holstein	1988	18	3	female				x
28397	Wadden Sea of Schleswig-Holstein	1988	3	2	female
28398	Wadden Sea of Schleswig-Holstein	1988	2	2	male
28399	Wadden Sea of Schleswig-Holstein	1988	15	3	male	x			x
28400	Wadden Sea of Schleswig-Holstein	1988	4	2	female
28401	Wadden Sea of Schleswig-Holstein	1988	12	3	female
28403	Wadden Sea of Schleswig-Holstein	1988	2	2	female
28404	Wadden Sea of Schleswig-Holstein	1988	9	3	male
28405	Wadden Sea of Schleswig-Holstein	1988	3	2	female
28406	Wadden Sea of Schleswig-Holstein	1988	5	2	female
28407	Wadden Sea of Schleswig-Holstein	1988	12	3	female
28408	Wadden Sea of Schleswig-Holstein	1988	3	2	female
28409	Wadden Sea of Schleswig-Holstein	1988	8	3	female
28410	Wadden Sea of Schleswig-Holstein	1988	4	2	male
28411	Wadden Sea of Schleswig-Holstein	1988	4	2	male
28412	Wadden Sea of Schleswig-Holstein	1988	1.08333	2	male				x
28413	Wadden Sea of Schleswig-Holstein	1988	7	3	female
28414	Wadden Sea of Schleswig-Holstein	1988	3	2	female	x
28415	Wadden Sea of Schleswig-Holstein	1988	4	2	male
28416	Wadden Sea of Schleswig-Holstein	1988	3	2	female
28417	Wadden Sea of Schleswig-Holstein	1988	7	3	male
28420	Wadden Sea of Schleswig-Holstein	1988	8	3	female
28421	Wadden Sea of Schleswig-Holstein	1988	1.08333	2	male
28422	Wadden Sea of Schleswig-Holstein	1988	2	2	female
28423	Wadden Sea of Schleswig-Holstein	1988	7	3	male
28425	Wadden Sea of Schleswig-Holstein	1988	7	3	female
28426	Wadden Sea of Schleswig-Holstein	1988	5	2	female			x
28427	Wadden Sea of Schleswig-Holstein	1988	7	3	female
28428	Wadden Sea of Schleswig-Holstein	1988	8	3	male
28430	Wadden Sea of Schleswig-Holstein	1988	7	3	male
28431	Wadden Sea of Schleswig-Holstein	1988	4	2	male
28432	Wadden Sea of Schleswig-Holstein	1988	4	2	male
28433	Wadden Sea of Schleswig-Holstein	1988	5	2	female
28434	Wadden Sea of Schleswig-Holstein	1988	13	3	male
28435	North Sea	1988	1	2	male
28441	Wadden Sea of Schleswig-Holstein	1988	6	3	female
28442	Wadden Sea of Schleswig-Holstein	1988	12	3	male				x
28443	Wadden Sea of Schleswig-Holstein	1988	8	3	male
28445	Wadden Sea of Schleswig-Holstein	1988	22	3	female	x			x
28446	Wadden Sea of Schleswig-Holstein	1988	2	2	female
28447	Wadden Sea of Schleswig-Holstein	1988	6	3	male	x			x
28449	Wadden Sea of Schleswig-Holstein	1989	5	2	male
28450	Wadden Sea of Schleswig-Holstein	1989	5	2	male
28451	Wadden Sea of Schleswig-Holstein	1989	4	2	female
28452	Wadden Sea of Schleswig-Holstein	1988	4	2	male
28453	Wadden Sea of Schleswig-Holstein	1988	4	2	male
28454	Wadden Sea of Schleswig-Holstein	1988	5	2	male
28455	Wadden Sea of Schleswig-Holstein	1988	5	2	female
28455	Wadden Sea of Schleswig-Holstein	1988	5	2	female
28457	Wadden Sea of Schleswig-Holstein	1988	1.08333	2	male
28458	Wadden Sea of Schleswig-Holstein	1988	4	2	female		x
28459	Wadden Sea of Schleswig-Holstein	1988	11	3	female	x
28460	Wadden Sea of Schleswig-Holstein	1988	4	2	female
28461	Wadden Sea of Schleswig-Holstein	1988	15	3	female
28463	Wadden Sea of Schleswig-Holstein	1988	7	3	male
28464	Wadden Sea of Schleswig-Holstein	1988	5	2	female
28465	Wadden Sea of Schleswig-Holstein	1988	8	3	female
28466	Wadden Sea of Schleswig-Holstein	1988	2	2	female
28467	Wadden Sea of Schleswig-Holstein	1988	0.0833333	1	female
28468	Wadden Sea of Schleswig-Holstein	1988	3	2	female
28470	Wadden Sea of Schleswig-Holstein	1988	1	2	male
28471	Wadden Sea of Schleswig-Holstein	1988	1	2	male
28472	Wadden Sea of Schleswig-Holstein	1988	1	2	female
28473	Wadden Sea of Schleswig-Holstein	1989	0.666667	2	female
28477	Wadden Sea of Schleswig-Holstein	1989	8	3	male
28482	Wadden Sea of Schleswig-Holstein	1988	2	2	male
28483	Wadden Sea of Schleswig-Holstein	1988	4	2	female	x
28484	Wadden Sea of Schleswig-Holstein	1988	14	3	female	x
28485	Wadden Sea of Schleswig-Holstein	1988	8	3	female
28486	Wadden Sea of Schleswig-Holstein	1988	12	3	male
28487	Wadden Sea of Schleswig-Holstein	1988	8	3	male		x
28488	Wadden Sea of Schleswig-Holstein	1988	4	2	male				x
28490	Wadden Sea of Schleswig-Holstein	1988	8	3	female
28491	Wadden Sea of Schleswig-Holstein	1988	4	2	female
28493	Wadden Sea of Schleswig-Holstein	1988	24	3	female	x
28494	Wadden Sea of Schleswig-Holstein	1988	8	3	male
28495	Wadden Sea of Schleswig-Holstein	1988	6	3	male
28496	North Sea	1988	6	3	female
28496	Wadden Sea of Schleswig-Holstein	1988	7	3	male	x
28497	Wadden Sea of Schleswig-Holstein	1988	11	3	female	x
28498	Wadden Sea of Schleswig-Holstein	1988	12	3	male				x
28499	Wadden Sea of Schleswig-Holstein	1988	13	3	female
28501	Wadden Sea of Schleswig-Holstein	1988	7	3	female
28502	Wadden Sea of Schleswig-Holstein	1988	8	3	female
28503	Wadden Sea of Schleswig-Holstein	1988	15	3	female	x
28504	Wadden Sea of Schleswig-Holstein	1988	24	3	female	x
28505	Wadden Sea of Schleswig-Holstein	1988	19	3	female	x
28506	Wadden Sea of Schleswig-Holstein	1988	3	2	male
28509	Wadden Sea of Schleswig-Holstein	1988	5	2	male
28510	Wadden Sea of Schleswig-Holstein	1988	9	3	male				x
28511	Wadden Sea of Schleswig-Holstein	1988	5	2	male
28512	Wadden Sea of Schleswig-Holstein	1988	6	3	female
28551	Wadden Sea of Schleswig-Holstein	1988	1	2	male
28552	Wadden Sea of Schleswig-Holstein	1989	6	3	female
28553	Wadden Sea of Schleswig-Holstein	1988	9	3	female
28555	Wadden Sea of Schleswig-Holstein	1988	24	3	female	x			x
28557	Wadden Sea of Schleswig-Holstein	1988	10	3	female	x
28558	Wadden Sea of Schleswig-Holstein	1988	1.08333	2	male
28559	Wadden Sea of Schleswig-Holstein	1988	6	3	female
28582	Wadden Sea of Schleswig-Holstein	1988	3	2	male
28583	Wadden Sea of Schleswig-Holstein	1988	1	2	female
28584	Wadden Sea of Schleswig-Holstein	1988	7	3	female
28585	Wadden Sea of Schleswig-Holstein	1988	3	2	female		x
28586	Wadden Sea of Schleswig-Holstein	1988	23	3	male
28586	Wadden Sea of Schleswig-Holstein	1988	3	2	male
28587	Wadden Sea of Schleswig-Holstein	1988	5	2	female
28588	Wadden Sea of Schleswig-Holstein	1988	10	3	female	x
28589	Wadden Sea of Schleswig-Holstein	1988	9	3	male
28590	Wadden Sea of Schleswig-Holstein	1988	3	2	female
28592	Wadden Sea of Schleswig-Holstein	1988	2	2	female
28593	Wadden Sea of Schleswig-Holstein	1988	4	2	female
28594	Wadden Sea of Schleswig-Holstein	1988	8	3	male	x			x
28595	Wadden Sea of Schleswig-Holstein	1988	7	3	male
28596	Wadden Sea of Schleswig-Holstein	1988	13	3	female
28630	Wadden Sea of Schleswig-Holstein	1988	24	3	female	x			x
28631	Wadden Sea of Schleswig-Holstein	1988	2	2	female
28632	Wadden Sea of Schleswig-Holstein	1988	2	2	male
28633	Wadden Sea of Schleswig-Holstein	1988	2	2	female
28635	Wadden Sea of Schleswig-Holstein	1988	23	3	female
28636	Wadden Sea of Schleswig-Holstein	1988	6	3	female
28637	Wadden Sea of Schleswig-Holstein	1988	14	3	female	x			x
28640	Wadden Sea of Schleswig-Holstein	1988	2	2	female
28641	Wadden Sea of Schleswig-Holstein	1988	18	3	female
28642	Wadden Sea of Schleswig-Holstein	1988	3	2	female
28643	Wadden Sea of Schleswig-Holstein	1988	4	2	male
28644	Wadden Sea of Schleswig-Holstein	1988	8	3	female
28645	Wadden Sea of Schleswig-Holstein	1988	5	2	male
28646	Wadden Sea of Schleswig-Holstein	1988	8	3	male	x
28647	Wadden Sea of Schleswig-Holstein	1988	9	3	male	x
28648	Wadden Sea of Schleswig-Holstein	1988	8	3	male
28649	Wadden Sea of Schleswig-Holstein	1988	6	3	male
28650	Wadden Sea of Schleswig-Holstein	1988	6	3	male
28651	Wadden Sea of Schleswig-Holstein	1988	12	3	male				x
28652	Wadden Sea of Schleswig-Holstein	1988	6	3	male
28653	Wadden Sea of Schleswig-Holstein	1988	14	3	male	x	x		x
28654	Wadden Sea of Schleswig-Holstein	1988	9	3	male				x
28655	Wadden Sea of Schleswig-Holstein	1988	11	3	male				x
28656	Wadden Sea of Schleswig-Holstein	1988	3	2	female
28657	Wadden Sea of Schleswig-Holstein	1988	5	2	male
28663	Wadden Sea of Schleswig-Holstein	1988	10	3	male				x
28665	Wadden Sea of Schleswig-Holstein	1988	1	2	female
28666	Wadden Sea of Schleswig-Holstein	1988	1	2	female
28667	Wadden Sea of Schleswig-Holstein	1988	2	2	female
28668	Wadden Sea of Schleswig-Holstein	1988	2	2	male
28670	Wadden Sea of Schleswig-Holstein	1988	3	2	male
28671	Wadden Sea of Schleswig-Holstein	1988	3	2	female
28672	Wadden Sea of Schleswig-Holstein	1988	5	2	female
28673	Wadden Sea of Schleswig-Holstein	1988	4	2	female
28674	Wadden Sea of Schleswig-Holstein	1988	6	3	female
28675	Wadden Sea of Schleswig-Holstein	1988	5	2	male
28676	Wadden Sea of Schleswig-Holstein	1988	6	3	male
28677	Wadden Sea of Schleswig-Holstein	1988	5	2	female
28678	Wadden Sea of Schleswig-Holstein	1989	0.833333	2	male
28679	Wadden Sea of Schleswig-Holstein	1988	7	3	female
28680	Wadden Sea of Schleswig-Holstein	1988	2	2	male
28681	Wadden Sea of Schleswig-Holstein	1988	11	3	male	x		x
28682	Wadden Sea of Schleswig-Holstein	1988	13	3	female	x
28683	Wadden Sea of Schleswig-Holstein	1988	13	3	female
28685	Wadden Sea of Schleswig-Holstein	1988	5	2	female	x
28686	Wadden Sea of Schleswig-Holstein	1988	7	3	male
28687	Wadden Sea of Schleswig-Holstein	1988	10	3	male
28688	Wadden Sea of Schleswig-Holstein	1988	5	2	male
28689	Wadden Sea of Schleswig-Holstein	1988	4	2	female
28708	Wadden Sea of Schleswig-Holstein	1988	2	2	female
28709	Wadden Sea of Schleswig-Holstein	1988	3	2	female
28710	Wadden Sea of Schleswig-Holstein	1988	7	3	female	x
28711	Wadden Sea of Schleswig-Holstein	1988	1	2	male
28712	Wadden Sea of Schleswig-Holstein	1988	4	2	male
28713	Wadden Sea of Schleswig-Holstein	1988	10	3	female
28715	Wadden Sea of Schleswig-Holstein	1988	2	2	female
28722	Wadden Sea of Schleswig-Holstein	1988	7	3	male
28723	Wadden Sea of Schleswig-Holstein	1988	10	3	male				x
28724	Wadden Sea of Schleswig-Holstein	1988	1	2	female
28725	Wadden Sea of Schleswig-Holstein	1988	2	2	female
28726	Wadden Sea of Schleswig-Holstein	1988	6	3	male				x
28727	Wadden Sea of Schleswig-Holstein	1988	10	3	male
28728	Wadden Sea of Schleswig-Holstein	1988	6	3	female
28729	Wadden Sea of Schleswig-Holstein	1988	5	2	male
28730	Wadden Sea of Schleswig-Holstein	1988	2	2	male		x
28732	Wadden Sea of Schleswig-Holstein	1988	3	2	male
28733	Wadden Sea of Schleswig-Holstein	1988	1	2	male
28734	Wadden Sea of Schleswig-Holstein	1988	7	3	male
28735	Wadden Sea of Schleswig-Holstein	1988	25	3	male	x		x	x
28736	Wadden Sea of Schleswig-Holstein	1988	3	2	female
28737	Wadden Sea of Schleswig-Holstein	1988	7	3	female
28739	Wadden Sea of Schleswig-Holstein	1988	24	3	female	x
28740	Wadden Sea of Schleswig-Holstein	1988	5	2	male
28741	Wadden Sea of Schleswig-Holstein	1988	2	2	male
28742	Wadden Sea of Schleswig-Holstein	1988	3	2	male
28743	Wadden Sea of Schleswig-Holstein	1988	3	2	male
28744	Wadden Sea of Schleswig-Holstein	1988	6	3	female
28745	Wadden Sea of Schleswig-Holstein	1988	23	3	male	x			x
28745	Wadden Sea of Schleswig-Holstein	1988	23	3	male	x		x	x
28747	Wadden Sea of Schleswig-Holstein	1988	8	3	male
28772	Wadden Sea of Schleswig-Holstein	1988	18	3	male	x
28773	Wadden Sea of Schleswig-Holstein	1988	5	2	female
28774	Wadden Sea of Schleswig-Holstein	1988	8	3	male
28775	Wadden Sea of Schleswig-Holstein	1988	18	3	female		x
28776	Wadden Sea of Schleswig-Holstein	1988	3	2	male
28778	Wadden Sea of Schleswig-Holstein	1988	14	3	female	x
28779	Wadden Sea of Schleswig-Holstein	1988	3	2	female	x
28780	Wadden Sea of Schleswig-Holstein	1988	8	3	male
28781	Wadden Sea of Schleswig-Holstein	1988	16	3	male
28782	Wadden Sea of Schleswig-Holstein	1988	3	2	female
28783	Wadden Sea of Schleswig-Holstein	1988	4	2	male		x
28784	Wadden Sea of Schleswig-Holstein	1988	25	3	female	x		x
28785	Wadden Sea of Schleswig-Holstein	1988	9	3	male
28786	Wadden Sea of Schleswig-Holstein	1988	7	3	female
28787	Wadden Sea of Schleswig-Holstein	1988	8	3	male
28788	Wadden Sea of Schleswig-Holstein	1988	12	3	female	x
28789	Wadden Sea of Schleswig-Holstein	1988	4	2	male
28790	Wadden Sea of Schleswig-Holstein	1989	8	3	female
28791	Wadden Sea of Schleswig-Holstein	1988	6	3	female
28792	Wadden Sea of Schleswig-Holstein	1988	22	3	female
28793	Wadden Sea of Schleswig-Holstein	1988	4	2	male
28794	Wadden Sea of Schleswig-Holstein	1988	11	3	male
28796	Wadden Sea of Schleswig-Holstein	1988	11	3	female
28797	Wadden Sea of Schleswig-Holstein	1988	4	2	female			x
28800	Wadden Sea of Schleswig-Holstein	1988	7	3	male
28802	Wadden Sea of Schleswig-Holstein	1988	10	3	female
28803	Wadden Sea of Schleswig-Holstein	1988	14	3	female
28804	Wadden Sea of Schleswig-Holstein	1988	9	3	male
28805	Wadden Sea of Schleswig-Holstein	1988	7	3	female
28806	Wadden Sea of Schleswig-Holstein	1988	8	3	female
28807	Wadden Sea of Schleswig-Holstein	1988	13	3	female
28808	Wadden Sea of Schleswig-Holstein	1988	7	3	female
28809	Wadden Sea of Schleswig-Holstein	1988	6	3	female
28810	Wadden Sea of Schleswig-Holstein	1988	9	3	female
28811	Wadden Sea of Schleswig-Holstein	1988	6	3	female
28812	Wadden Sea of Schleswig-Holstein	1988	10	3	male
28813	Wadden Sea of Schleswig-Holstein	1988	11	3	male	x			x
28814	Wadden Sea of Schleswig-Holstein	1988	10	3	female
28815	Wadden Sea of Schleswig-Holstein	1988	23	3	female	x
28816	Wadden Sea of Schleswig-Holstein	1988	4	2	male
28817	Wadden Sea of Schleswig-Holstein	1988	22	3	female
28818	Wadden Sea of Schleswig-Holstein	1988	8	3	female
28819	Wadden Sea of Schleswig-Holstein	1988	3	2	male
28820	Wadden Sea of Schleswig-Holstein	1988	7	3	female
28821	Wadden Sea of Schleswig-Holstein	1988	2	2	female
28822	Wadden Sea of Schleswig-Holstein	1988	1	2	female		x
28846	Wadden Sea of Schleswig-Holstein	1988	9	3	female
28847	Wadden Sea of Schleswig-Holstein	1988	5	2	male
28848	Wadden Sea of Schleswig-Holstein	1988	11	3	female				x
28849	Wadden Sea of Schleswig-Holstein	1988	2	2	female
28850	Wadden Sea of Schleswig-Holstein	1988	10	3	female
28851	Wadden Sea of Schleswig-Holstein	1988	1	2	male
28852	Wadden Sea of Schleswig-Holstein	1988	2	2	female
28855	Wadden Sea of Schleswig-Holstein	1988	15	3	male	x		x
28856	Wadden Sea of Schleswig-Holstein	1988	5	2	female
28857	Wadden Sea of Schleswig-Holstein	1988	3	2	female
28858	Wadden Sea of Schleswig-Holstein	1988	4	2	female
28859	Wadden Sea of Schleswig-Holstein	1988	2	2	male
28860	Wadden Sea of Schleswig-Holstein	1988	1	2	female	x
28861	Wadden Sea of Schleswig-Holstein	1988	4	2	male
28862	Wadden Sea of Schleswig-Holstein	1988	3	2	male
28864	Wadden Sea of Schleswig-Holstein	1988	0.0833333	1	male
28865	Wadden Sea of Schleswig-Holstein	1988	3	2	male
28867	Wadden Sea of Schleswig-Holstein	1988	7	3	male
28868	Wadden Sea of Schleswig-Holstein	1988	10	3	male				x
28869	Wadden Sea of Schleswig-Holstein	1988	2	2	female
28870	Wadden Sea of Schleswig-Holstein	1988	4	2	male
28871	Wadden Sea of Schleswig-Holstein	1988	1	2	male
28872	Wadden Sea of Schleswig-Holstein	1988	2	2	male
28873	Wadden Sea of Schleswig-Holstein	1988	3	2	male
28874	Wadden Sea of Schleswig-Holstein	1988	2	2	female
28875	Wadden Sea of Schleswig-Holstein	1988	5	2	female
28876	Wadden Sea of Schleswig-Holstein	1988	2	2	female	x
28877	Wadden Sea of Schleswig-Holstein	1988	16	3	male	x			x
28878	Wadden Sea of Schleswig-Holstein	1988	1.08333	2	female
28879	Wadden Sea of Schleswig-Holstein	1988	2	2	female
28880	Wadden Sea of Schleswig-Holstein	1988	18	3	female	x			x
28881	Wadden Sea of Schleswig-Holstein	1988	2	2	male
28882	Wadden Sea of Schleswig-Holstein	1988	8	3	male
28883	Wadden Sea of Schleswig-Holstein	1988	17	3	female
28884	Wadden Sea of Schleswig-Holstein	1988	4	2	male
28885	Wadden Sea of Schleswig-Holstein	1988	8	3	male
28886	Wadden Sea of Schleswig-Holstein	1988	5	2	male
28887	Wadden Sea of Schleswig-Holstein	1988	6	3	male
28888	Wadden Sea of Schleswig-Holstein	1988	9	3	male
28889	Wadden Sea of Schleswig-Holstein	1988	16	3	female
28890	Wadden Sea of Schleswig-Holstein	1988	16	3	male	x
28891	Wadden Sea of Schleswig-Holstein	1988	12	3	male
28892	Wadden Sea of Schleswig-Holstein	1988	5	2	female	x
28893	Wadden Sea of Schleswig-Holstein	1988	3	2	female
28894	Wadden Sea of Schleswig-Holstein	1989	0.833333	2	male
28895	Wadden Sea of Schleswig-Holstein	1988	5	2	male
28896	Wadden Sea of Schleswig-Holstein	1989	6	3	female		x
28908	Wadden Sea of Schleswig-Holstein	1988	24	3	female	x			x
28927	Wadden Sea of Schleswig-Holstein	1989	8	3	female
28940	Wadden Sea of Schleswig-Holstein	1988	9	3	female
28942	Wadden Sea of Schleswig-Holstein	1988	3	2	female	x
28943	Wadden Sea of Schleswig-Holstein	1988	2	2	male
28944	Wadden Sea of Schleswig-Holstein	1988	12	3	male
28945	Wadden Sea of Schleswig-Holstein	1988	3	2	female
28946	Wadden Sea of Schleswig-Holstein	1988	7	3	female
28947	Wadden Sea of Schleswig-Holstein	1988	23	3	female	x			x
28948	Wadden Sea of Schleswig-Holstein	1988	3	2	female
28949	Wadden Sea of Schleswig-Holstein	1988	1.08333	2	female
28950	Wadden Sea of Schleswig-Holstein	1988	9	3	female
28951	Wadden Sea of Schleswig-Holstein	1988	5	2	female
28954	Wadden Sea of Schleswig-Holstein	1988	25	3	female
28955	Wadden Sea of Schleswig-Holstein	1988	10	3	male
28956	Wadden Sea of Schleswig-Holstein	1988	4	2	female
28957	Wadden Sea of Schleswig-Holstein	1988	13	3	female
28960	Wadden Sea of Schleswig-Holstein	1988	5	2	female
28961	Wadden Sea of Schleswig-Holstein	1988	10	3	female
28962	Wadden Sea of Schleswig-Holstein	1988	3	2	female
28963	Wadden Sea of Schleswig-Holstein	1988	6	3	female
28964	Wadden Sea of Schleswig-Holstein	1988	6	3	female
28965	Wadden Sea of Schleswig-Holstein	1988	7	3	male
28966	Wadden Sea of Schleswig-Holstein	1988	10	3	female
28967	Wadden Sea of Schleswig-Holstein	1988	7	3	female
28968	Wadden Sea of Schleswig-Holstein	1988	7	3	female
28969	Wadden Sea of Schleswig-Holstein	1988	11	3	female
28971	Wadden Sea of Schleswig-Holstein	1988	3	2	female
28972	Wadden Sea of Schleswig-Holstein	1988	4	2	male
28973	Wadden Sea of Schleswig-Holstein	1988	7	3	male
28974	Wadden Sea of Schleswig-Holstein	1988	7	3	male
28975	Wadden Sea of Schleswig-Holstein	1988	6	3	female
28976	Wadden Sea of Schleswig-Holstein	1988	10	3	female
28977	Wadden Sea of Schleswig-Holstein	1988	11	3	female
28978	Wadden Sea of Schleswig-Holstein	1988	13	3	female
28979	Wadden Sea of Schleswig-Holstein	1988	18	3	female
28980	Wadden Sea of Schleswig-Holstein	1988	10	3	male	x
28981	Wadden Sea of Schleswig-Holstein	1988	10	3	female
28983	Wadden Sea of Schleswig-Holstein	1988	10	3	male
28984	Wadden Sea of Schleswig-Holstein	1988	5	2	female
28985	Wadden Sea of Schleswig-Holstein	1988	5	2	female
28986	North Sea	1988	4	2	male
28987	Wadden Sea of Schleswig-Holstein	1988	8	3	female
28988	Wadden Sea of Schleswig-Holstein	1988	3	2	female		x
28990	Wadden Sea of Schleswig-Holstein	1989	6	3	male			x
28991	Wadden Sea of Schleswig-Holstein	1989	8	3	female
28992	Wadden Sea of Schleswig-Holstein	1989	0.0833333	1	male
28993	Wadden Sea of Schleswig-Holstein	1988	7	3	female
29004	Wadden Sea of Schleswig-Holstein	1988	2	2	male
29005	Wadden Sea of Schleswig-Holstein	1988	7	3	male	x
29006	Wadden Sea of Schleswig-Holstein	1988	3	2	male	x
29007	Wadden Sea of Schleswig-Holstein	1988	7	3	female
29008	Wadden Sea of Schleswig-Holstein	1988	2	2	male
29011	Wadden Sea of Schleswig-Holstein	1988	6	3	female
29012	Wadden Sea of Schleswig-Holstein	1988	2	2	female
29013	Wadden Sea of Schleswig-Holstein	1988	9	3	male
29014	Wadden Sea of Schleswig-Holstein	1988	4	2	female
29015	Wadden Sea of Schleswig-Holstein	1988	4	2	female
29016	Wadden Sea of Schleswig-Holstein	1988	7	3	female	x
29017	Wadden Sea of Schleswig-Holstein	1988	3	2	female
29018	Wadden Sea of Schleswig-Holstein	1988	8	3	female
29019	Wadden Sea of Schleswig-Holstein	1988	13	3	male	x
29026	Wadden Sea of Schleswig-Holstein	1988	4	2	male
29028	Wadden Sea of Schleswig-Holstein	1988	9	3	female
29029	Wadden Sea of Schleswig-Holstein	1988	22	3	male	x
29031	Wadden Sea of Schleswig-Holstein	1988	11	3	female
29032	Wadden Sea of Schleswig-Holstein	1988	8	3	male
29033	Wadden Sea of Schleswig-Holstein	1988	9	3	male
29034	Wadden Sea of Schleswig-Holstein	1988	14	3	male
29035	Wadden Sea of Schleswig-Holstein	1988	14	3	male	x		x
29037	Wadden Sea of Schleswig-Holstein	1988	6	3	female
29038	Wadden Sea of Schleswig-Holstein	1988	14	3	male	x			x
29038	Wadden Sea of Schleswig-Holstein	1988	17	3	male	x
29039	Wadden Sea of Schleswig-Holstein	1988	8	3	female
29040	Wadden Sea of Schleswig-Holstein	1988	3	2	female
29042	Wadden Sea of Schleswig-Holstein	1989	11	3	female
29043	Wadden Sea of Schleswig-Holstein	1988	10	3	female
29044	Wadden Sea of Schleswig-Holstein	1988	11	3	female	x
29045	Wadden Sea of Schleswig-Holstein	1988	4	2	female
29046	Wadden Sea of Schleswig-Holstein	1988	8	3	male
29047	Wadden Sea of Schleswig-Holstein	1988	7	3	female
29048	Wadden Sea of Schleswig-Holstein	1988	13	3	female
29049	Wadden Sea of Schleswig-Holstein	1988	6	3	female
29051	Wadden Sea of Schleswig-Holstein	1988	12	3	female	x
29052	Wadden Sea of Schleswig-Holstein	1988	6	3	female
29054	Wadden Sea of Schleswig-Holstein	1988	17	3	female	x
29055	Wadden Sea of Schleswig-Holstein	1988	6	3	male
29056	Wadden Sea of Schleswig-Holstein	1988	7	3	male
29057	Wadden Sea of Schleswig-Holstein	1988	8	3	female
29058	Wadden Sea of Schleswig-Holstein	1988	7	3	male
29059	Wadden Sea of Schleswig-Holstein	1988	3	2	female
29060	Wadden Sea of Schleswig-Holstein	1988	4	2	female
29061	Wadden Sea of Schleswig-Holstein	1988	11	3	male				x
29062	Wadden Sea of Schleswig-Holstein	1988	1.08333	2	female
29063	Wadden Sea of Schleswig-Holstein	1988	2	2	female
29064	Wadden Sea of Schleswig-Holstein	1988	23	3	male	x
29065	Wadden Sea of Schleswig-Holstein	1988	7	3	male
29066	Wadden Sea of Schleswig-Holstein	1988	12	3	female
29067	Wadden Sea of Schleswig-Holstein	1988	4	2	male
29068	Wadden Sea of Schleswig-Holstein	1988	8	3	male
29069	Wadden Sea of Schleswig-Holstein	1988	23	3	female	x
29073	Wadden Sea of Schleswig-Holstein	1988	8	3	female	x
29074	Wadden Sea of Schleswig-Holstein	1988	22	3	female				x
29075	Wadden Sea of Schleswig-Holstein	1988	8	3	male	x			x
29077	Wadden Sea of Schleswig-Holstein	1988	6	3	male	x
29078	Wadden Sea of Schleswig-Holstein	1988	4	2	female
29079	Wadden Sea of Schleswig-Holstein	1988	6	3	male
29080	Wadden Sea of Schleswig-Holstein	1988	11	3	male
29081	Wadden Sea of Schleswig-Holstein	1988	11	3	male
29082	Wadden Sea of Schleswig-Holstein	1988	18	3	male	x
29083	Wadden Sea of Schleswig-Holstein	1988	9	3	male	x
29084	Wadden Sea of Schleswig-Holstein	1988	2	2	female
29085	Wadden Sea of Schleswig-Holstein	1988	11	3	male	x
29086	Wadden Sea of Schleswig-Holstein	1988	8	3	female
29088	Wadden Sea of Schleswig-Holstein	1988	2	2	male
29089	Wadden Sea of Schleswig-Holstein	1988	4	2	male
29091	Wadden Sea of Schleswig-Holstein	1988	18	3	male	x	x		x
29092	Wadden Sea of Schleswig-Holstein	1988	12	3	male	x			x
29093	Wadden Sea of Schleswig-Holstein	1988	10	3	male
29094	Wadden Sea of Schleswig-Holstein	1988	2	2	male
29095	Wadden Sea of Schleswig-Holstein	1988	1	2	female
29098	Wadden Sea of Schleswig-Holstein	1988	1.08333	2	female
29099	Wadden Sea of Schleswig-Holstein	1988	4	2	male			x
29107	Wadden Sea of Schleswig-Holstein	1988	13	3	male	x			x
29108	Wadden Sea of Schleswig-Holstein	1988	1	2	female	x
29109	Wadden Sea of Schleswig-Holstein	1988	2	2	male
29110	Wadden Sea of Schleswig-Holstein	1988	3	2	male
29111	Wadden Sea of Schleswig-Holstein	1988	8	3	female
29112	Wadden Sea of Schleswig-Holstein	1988	11	3	male
29113	Wadden Sea of Schleswig-Holstein	1988	9	3	male
29114	Wadden Sea of Schleswig-Holstein	1988	1.16667	2	female
29115	Wadden Sea of Schleswig-Holstein	1988	11	3	female		x		x
29116	Wadden Sea of Schleswig-Holstein	1988	13	3	male	x
29117	Wadden Sea of Schleswig-Holstein	1988	24	3	female	x
29118	Wadden Sea of Schleswig-Holstein	1988	14	3	male
29119	Wadden Sea of Schleswig-Holstein	1988	8	3	male
29120	Wadden Sea of Schleswig-Holstein	1988	5	2	male			x
29121	Wadden Sea of Schleswig-Holstein	1988	6	3	male
29122	Wadden Sea of Schleswig-Holstein	1988	14	3	female
29123	Wadden Sea of Schleswig-Holstein	1988	8	3	female
29124	Wadden Sea of Schleswig-Holstein	1988	7	3	male
29125	Wadden Sea of Schleswig-Holstein	1988	9	3	female
29126	Wadden Sea of Schleswig-Holstein	1988	8	3	male
29127	Wadden Sea of Schleswig-Holstein	1988	4	2	female
29128	Wadden Sea of Schleswig-Holstein	1988	8	3	female
29129	Wadden Sea of Schleswig-Holstein	1988	6	3	female
29130	Wadden Sea of Schleswig-Holstein	1988	2	2	male
29131	Wadden Sea of Schleswig-Holstein	1988	5	2	female
29132	Wadden Sea of Schleswig-Holstein	1988	10	3	male	x			x
29134	Wadden Sea of Schleswig-Holstein	1988	5	2	male
29135	Wadden Sea of Schleswig-Holstein	1988	3	2	male
29136	Wadden Sea of Schleswig-Holstein	1988	11	3	female
29137	Wadden Sea of Schleswig-Holstein	1988	6	3	female
29138	Wadden Sea of Schleswig-Holstein	1988	2	2	male
29139	Wadden Sea of Schleswig-Holstein	1988	3	2	female
29140	Wadden Sea of Schleswig-Holstein	1988	6	3	female
29141	Wadden Sea of Schleswig-Holstein	1988	8	3	male				x
29142	Wadden Sea of Schleswig-Holstein	1988	13	3	male
29143	Wadden Sea of Schleswig-Holstein	1988	4	2	female
29144	Wadden Sea of Schleswig-Holstein	1988	3	2	male
29146	Wadden Sea of Schleswig-Holstein	1988	22	3	female	x			x
29147	Wadden Sea of Schleswig-Holstein	1988	4	2	male
29148	Wadden Sea of Schleswig-Holstein	1988	12	3	female
29149	Wadden Sea of Schleswig-Holstein	1988	2	2	male
29150	Wadden Sea of Schleswig-Holstein	1988	5	2	female
29151	Wadden Sea of Schleswig-Holstein	1988	10	3	female
29152	Wadden Sea of Schleswig-Holstein	1988	13	3	male
29153	Wadden Sea of Schleswig-Holstein	1988	11	3	female
29154	Wadden Sea of Schleswig-Holstein	1988	10	3	female	x
29155	Wadden Sea of Schleswig-Holstein	1988	12	3	female	x
29156	Wadden Sea of Schleswig-Holstein	1988	3	2	male
29157	Wadden Sea of Schleswig-Holstein	1988	6	3	male
29158	Wadden Sea of Schleswig-Holstein	1988	2	2	male
29160	Wadden Sea of Schleswig-Holstein	1988	4	2	male
29161	Wadden Sea of Schleswig-Holstein	1988	15	3	male	x		x	x
29162	Wadden Sea of Schleswig-Holstein	1988	5	2	female
29163	Wadden Sea of Schleswig-Holstein	1988	1.16667	2	female
29164	Wadden Sea of Schleswig-Holstein	1988	10	3	male
29165	Wadden Sea of Schleswig-Holstein	1988	13	3	male
29166	Wadden Sea of Schleswig-Holstein	1988	8	3	female
29167	Wadden Sea of Schleswig-Holstein	1988	13	3	female	x
29168	Wadden Sea of Schleswig-Holstein	1988	6	3	male	x
29169	Wadden Sea of Schleswig-Holstein	1988	7	3	female
29170	Wadden Sea of Schleswig-Holstein	1988	2	2	male
29171	Wadden Sea of Schleswig-Holstein	1988	8	3	male
29172	Wadden Sea of Schleswig-Holstein	1988	16	3	male	x		x
29173	Wadden Sea of Schleswig-Holstein	1988	2	2	male
29174	Wadden Sea of Schleswig-Holstein	1988	2	2	female
29175	Wadden Sea of Schleswig-Holstein	1988	11	3	female
29176	Wadden Sea of Schleswig-Holstein	1988	1.08333	2	male
29177	Wadden Sea of Schleswig-Holstein	1988	7	3	female
29179	Wadden Sea of Schleswig-Holstein	1988	5	2	female
29180	Wadden Sea of Schleswig-Holstein	1988	3	2	male		x
29181	Wadden Sea of Schleswig-Holstein	1988	5	2	female
29182	Wadden Sea of Schleswig-Holstein	1988	9	3	female
29183	Wadden Sea of Schleswig-Holstein	1988	7	3	male
29184	Wadden Sea of Schleswig-Holstein	1988	2	2	male
29185	Wadden Sea of Schleswig-Holstein	1988	6	3	female
29186	Wadden Sea of Schleswig-Holstein	1988	11	3	male	x
29187	Wadden Sea of Schleswig-Holstein	1988	5	2	male
29187	Wadden Sea of Schleswig-Holstein	1988	8	3	male	x
29188	Wadden Sea of Schleswig-Holstein	1988	17	3	male	x
29189	Wadden Sea of Schleswig-Holstein	1988	5	2	female
29190	Wadden Sea of Schleswig-Holstein	1988	7	3	female
29191	Wadden Sea of Schleswig-Holstein	1988	16	3	male
29192	Wadden Sea of Schleswig-Holstein	1988	4	2	male			x
29194	Wadden Sea of Schleswig-Holstein	1988	3	2	male
29195	Wadden Sea of Schleswig-Holstein	1988	12	3	female	x
29196	Wadden Sea of Schleswig-Holstein	1988	2	2	female
29197	Wadden Sea of Schleswig-Holstein	1988	7	3	female	x
29199	Wadden Sea of Schleswig-Holstein	1988	4	2	female
29199	Wadden Sea of Schleswig-Holstein	1988	4	2	female
29200	Wadden Sea of Schleswig-Holstein	1988	3	2	female
29201	Wadden Sea of Schleswig-Holstein	1988	8	3	male
29202	Wadden Sea of Schleswig-Holstein	1988	10	3	male				x
29203	Wadden Sea of Schleswig-Holstein	1988	18	3	female	x			x
29204	Wadden Sea of Schleswig-Holstein	1988	7	3	male
29205	Wadden Sea of Schleswig-Holstein	1988	5	2	male
29206	Wadden Sea of Schleswig-Holstein	1988	9	3	male
29207	Wadden Sea of Schleswig-Holstein	1988	9	3	male
29208	Wadden Sea of Schleswig-Holstein	1988	2	2	male
29210	Wadden Sea of Schleswig-Holstein	1988	5	2	female
29211	Wadden Sea of Schleswig-Holstein	1988	3	2	male
29212	Wadden Sea of Schleswig-Holstein	1988	18	3	female			x
29213	Wadden Sea of Schleswig-Holstein	1988	5	2	male
29214	Wadden Sea of Schleswig-Holstein	1988	5	2	female	x
29215	Wadden Sea of Schleswig-Holstein	1988	13	3	male				x
29216	Wadden Sea of Schleswig-Holstein	1988	10	3	female
29218	Wadden Sea of Schleswig-Holstein	1988	3	2	female
29219	Wadden Sea of Schleswig-Holstein	1988	10	3	female
29220	Wadden Sea of Schleswig-Holstein	1988	4	2	female
29221	Wadden Sea of Schleswig-Holstein	1988	8	3	male	x
29222	Wadden Sea of Schleswig-Holstein	1988	12	3	female
29223	Wadden Sea of Schleswig-Holstein	1988	8	3	female
29224	Wadden Sea of Schleswig-Holstein	1988	5	2	female
29225	Wadden Sea of Schleswig-Holstein	1988	7	3	female
29226	Wadden Sea of Schleswig-Holstein	1988	4	2	male
29227	Wadden Sea of Schleswig-Holstein	1988	7	3	female	x
29228	Wadden Sea of Schleswig-Holstein	1988	6	3	female
29230	Wadden Sea of Schleswig-Holstein	1988	7	3	male				x
29231	Wadden Sea of Schleswig-Holstein	1988	12	3	male	x
29232	Wadden Sea of Schleswig-Holstein	1988	10	3	female	x
29233	Wadden Sea of Schleswig-Holstein	1988	4	2	male
29234	Wadden Sea of Schleswig-Holstein	1988	3	2	male
29235	Wadden Sea of Schleswig-Holstein	1988	12	3	male
29236	Wadden Sea of Schleswig-Holstein	1988	2	2	male
29237	Wadden Sea of Schleswig-Holstein	1988	6	3	male
29238	Wadden Sea of Schleswig-Holstein	1988	6	3	male
29239	Wadden Sea of Schleswig-Holstein	1988	8	3	female
29240	Wadden Sea of Schleswig-Holstein	1988	12	3	male	x
29241	Wadden Sea of Schleswig-Holstein	1988	7	3	female
29242	Wadden Sea of Schleswig-Holstein	1988	4	2	female
29243	Wadden Sea of Schleswig-Holstein	1988	7	3	male
29244	Wadden Sea of Schleswig-Holstein	1988	3	2	female
29245	Wadden Sea of Schleswig-Holstein	1988	14	3	female
29246	Wadden Sea of Schleswig-Holstein	1988	11	3	female
29247	Wadden Sea of Schleswig-Holstein	1988	3	2	female
29248	Wadden Sea of Schleswig-Holstein	1988	10	3	male	x			x
29249	Wadden Sea of Schleswig-Holstein	1988	7	3	male
29250	Wadden Sea of Schleswig-Holstein	1988	4	2	female
29251	Wadden Sea of Schleswig-Holstein	1988	7	3	male
29253	Wadden Sea of Schleswig-Holstein	1988	7	3	male
29255	Wadden Sea of Schleswig-Holstein	1988	11	3	male
29256	Wadden Sea of Schleswig-Holstein	1988	6	3	male			x
29258	Wadden Sea of Schleswig-Holstein	1988	7	3	male
29259	Wadden Sea of Schleswig-Holstein	1988	6	3	male
29260	Wadden Sea of Schleswig-Holstein	1988	12	3	male
29262	Wadden Sea of Schleswig-Holstein	1988	4	2	male
29264	Wadden Sea of Schleswig-Holstein	1988	14	3	male	x
29265	Wadden Sea of Schleswig-Holstein	1988	25	3	female	x			x
29272	Wadden Sea of Schleswig-Holstein	1988	7	3	male
29273	Wadden Sea of Schleswig-Holstein	1988	7	3	male
29274	Wadden Sea of Schleswig-Holstein	1988	4	2	male
29276	Wadden Sea of Schleswig-Holstein	1988	15	3	female
29278	Wadden Sea of Schleswig-Holstein	1988	2	2	female
29279	Wadden Sea of Schleswig-Holstein	1988	8	3	female
29280	Wadden Sea of Schleswig-Holstein	1988	3	2	male
29281	Wadden Sea of Schleswig-Holstein	1988	6	3	male
29282	Wadden Sea of Schleswig-Holstein	1988	3	2	male
29284	Wadden Sea of Schleswig-Holstein	1988	3	2	female
29285	Wadden Sea of Schleswig-Holstein	1988	12	3	female
29286	Wadden Sea of Schleswig-Holstein	1988	5	2	male
29287	Wadden Sea of Schleswig-Holstein	1988	6	3	female
29288	Wadden Sea of Schleswig-Holstein	1988	7	3	male
29292	Wadden Sea of Schleswig-Holstein	1988	12	3	female
29293	Wadden Sea of Schleswig-Holstein	1988	5	2	male
29294	Wadden Sea of Schleswig-Holstein	1988	7	3	female
29295	Wadden Sea of Schleswig-Holstein	1988	4	2	male
29296	Wadden Sea of Schleswig-Holstein	1988	2	2	female
29297	Wadden Sea of Schleswig-Holstein	1988	13	3	male	x
29299	Wadden Sea of Schleswig-Holstein	1988	11	3	male				x
29302	Wadden Sea of Schleswig-Holstein	1988	6	3	male
29303	Wadden Sea of Schleswig-Holstein	1988	7	3	male
29304	Wadden Sea of Schleswig-Holstein	1988	2	2	male
29305	Wadden Sea of Schleswig-Holstein	1988	4	2	male	x
29306	Wadden Sea of Schleswig-Holstein	1988	25	3	female	x			x
29307	Wadden Sea of Schleswig-Holstein	1988	6	3	male				x
29308	Wadden Sea of Schleswig-Holstein	1988	10	3	male	x
29309	Wadden Sea of Schleswig-Holstein	1988	14	3	male	x
29310	Wadden Sea of Schleswig-Holstein	1988	3	2	male
29311	Wadden Sea of Schleswig-Holstein	1988	7	3	male
29312	Wadden Sea of Schleswig-Holstein	1988	9	3	male
29313	Wadden Sea of Schleswig-Holstein	1988	3	2	female	x
29314	Wadden Sea of Schleswig-Holstein	1988	2	2	female
29315	Wadden Sea of Schleswig-Holstein	1988	2	2	male
29316	Wadden Sea of Schleswig-Holstein	1988	8	3	male
29317	Wadden Sea of Schleswig-Holstein	1988	8	3	female
29318	Wadden Sea of Schleswig-Holstein	1988	6	3	female	x
29319	Wadden Sea of Schleswig-Holstein	1988	23	3	female
29323	Wadden Sea of Schleswig-Holstein	1988	2	2	male
29324	Wadden Sea of Schleswig-Holstein	1988	18	3	female
29325	Wadden Sea of Schleswig-Holstein	1988	7	3	male
29326	Wadden Sea of Schleswig-Holstein	1988	7	3	female
29327	Wadden Sea of Schleswig-Holstein	1988	10	3	female	x
29328	Wadden Sea of Schleswig-Holstein	1988	8	3	male
29329	Wadden Sea of Schleswig-Holstein	1988	7	3	male
29330	Wadden Sea of Schleswig-Holstein	1988	11	3	male				x
29331	Wadden Sea of Schleswig-Holstein	1988	2	2	female
29332	Wadden Sea of Schleswig-Holstein	1988	4	2	female
29333	Wadden Sea of Schleswig-Holstein	1988	11	3	male	x
29334	Wadden Sea of Schleswig-Holstein	1988	12	3	male	x			x
29335	Wadden Sea of Schleswig-Holstein	1988	11	3	female
29336	Wadden Sea of Schleswig-Holstein	1988	18	3	female
29338	Wadden Sea of Schleswig-Holstein	1988	9	3	male
29341	Wadden Sea of Schleswig-Holstein	1988	4	2	male
29342	Wadden Sea of Schleswig-Holstein	1988	11	3	male	x			x
29345	Wadden Sea of Schleswig-Holstein	1988	9	3	female
29346	Wadden Sea of Schleswig-Holstein	1988	6	3	female
29347	Wadden Sea of Schleswig-Holstein	1988	1.08333	2	male
29348	Wadden Sea of Schleswig-Holstein	1988	4	2	female				x
29349	Wadden Sea of Schleswig-Holstein	1988	22	3	female
29350	Wadden Sea of Schleswig-Holstein	1988	6	3	male
29351	Wadden Sea of Schleswig-Holstein	1988	24	3	male				x
29352	Wadden Sea of Schleswig-Holstein	1988	4	2	male	x			x
29354	Wadden Sea of Schleswig-Holstein	1988	10	3	female
29355	Wadden Sea of Schleswig-Holstein	1988	10	3	female
29356	Wadden Sea of Schleswig-Holstein	1988	5	2	female
29357	Wadden Sea of Schleswig-Holstein	1988	5	2	female
29358	Wadden Sea of Schleswig-Holstein	1988	2	2	male
29360	Wadden Sea of Schleswig-Holstein	1988	18	3	female	x
29360	Wadden Sea of Schleswig-Holstein	1988	18	3	female	x
29361	Wadden Sea of Schleswig-Holstein	1988	9	3	female
29362	Wadden Sea of Schleswig-Holstein	1988	2	2	female
29363	Wadden Sea of Schleswig-Holstein	1988	7	3	female	x
29364	Wadden Sea of Schleswig-Holstein	1988	2	2	male
29365	Wadden Sea of Schleswig-Holstein	1988	6	3	male
29366	Wadden Sea of Schleswig-Holstein	1988	4	2	male
29367	Wadden Sea of Schleswig-Holstein	1988	3	2	male
29368	Wadden Sea of Schleswig-Holstein	1988	7	3	male
29369	Wadden Sea of Schleswig-Holstein	1988	3	2	male
29370	Wadden Sea of Schleswig-Holstein	1988	10	3	male
29371	Wadden Sea of Schleswig-Holstein	1988	9	3	female
29372	Wadden Sea of Schleswig-Holstein	1988	11	3	male
29373	Wadden Sea of Schleswig-Holstein	1988	7	3	male		x
29374	Wadden Sea of Schleswig-Holstein	1988	4	2	male
29375	Wadden Sea of Schleswig-Holstein	1988	12	3	male
29376	Wadden Sea of Schleswig-Holstein	1988	5	2	female
29377	Wadden Sea of Schleswig-Holstein	1988	6	3	male
29378	Wadden Sea of Schleswig-Holstein	1988	6	3	female
29379	Wadden Sea of Schleswig-Holstein	1988	4	2	female
29380	Wadden Sea of Schleswig-Holstein	1988	12	3	female	x
29381	Wadden Sea of Schleswig-Holstein	1988	3	2	female
29382	Wadden Sea of Schleswig-Holstein	1988	2	2	male
29383	Wadden Sea of Schleswig-Holstein	1988	7	3	female
29383	Wadden Sea of Schleswig-Holstein	1988	14	3	male	x
29384	Wadden Sea of Schleswig-Holstein	1988	6	3	female
29385	Wadden Sea of Schleswig-Holstein	1988	3	2	male
29386	Wadden Sea of Schleswig-Holstein	1988	9	3	male
29387	Wadden Sea of Schleswig-Holstein	1988	3	2	male
29388	Wadden Sea of Schleswig-Holstein	1988	13	3	male				x
29389	Wadden Sea of Schleswig-Holstein	1988	11	3	male	x			x
29390	Wadden Sea of Schleswig-Holstein	1988	4	2	male
29391	Wadden Sea of Schleswig-Holstein	1988	16	3	male	x
29392	Wadden Sea of Schleswig-Holstein	1988	3	2	female
29393	Wadden Sea of Schleswig-Holstein	1988	22	3	female
29394	Wadden Sea of Schleswig-Holstein	1988	5	2	female
29395	Wadden Sea of Schleswig-Holstein	1988	7	3	female
29396	Wadden Sea of Schleswig-Holstein	1988	4	2	female
29397	Wadden Sea of Schleswig-Holstein	1988	4	2	female
29398	Wadden Sea of Schleswig-Holstein	1988	3	2	female
29399	Wadden Sea of Schleswig-Holstein	1988	14	3	male
29400	Wadden Sea of Schleswig-Holstein	1988	4	2	female
29401	Wadden Sea of Schleswig-Holstein	1988	9	3	male				x
29402	Wadden Sea of Schleswig-Holstein	1988	9	3	male	x
29403	Wadden Sea of Schleswig-Holstein	1988	4	2	male
29404	Wadden Sea of Schleswig-Holstein	1988	13	3	male	x
29405	Wadden Sea of Schleswig-Holstein	1988	10	3	female
29406	Wadden Sea of Schleswig-Holstein	1988	8	3	male	x
29407	Wadden Sea of Schleswig-Holstein	1988	24	3	female	x
29409	Wadden Sea of Schleswig-Holstein	1988	9	3	female
29410	Wadden Sea of Schleswig-Holstein	1988	1.08333	2	male
29411	Wadden Sea of Schleswig-Holstein	1988	3	2	female
29412	Wadden Sea of Schleswig-Holstein	1988	4	2	female
29413	Wadden Sea of Schleswig-Holstein	1988	2	2	female
29414	Wadden Sea of Schleswig-Holstein	1988	1.08333	2	male
29415	Wadden Sea of Schleswig-Holstein	1988	4	2	male
29416	Wadden Sea of Schleswig-Holstein	1988	24	3	female	x
29417	Wadden Sea of Schleswig-Holstein	1988	5	2	male
29418	Wadden Sea of Schleswig-Holstein	1988	2	2	female
29419	Wadden Sea of Schleswig-Holstein	1988	4	2	female
29420	Wadden Sea of Schleswig-Holstein	1988	0.0384615	1	female
29421	Wadden Sea of Schleswig-Holstein	1988	8	3	female
29422	Wadden Sea of Schleswig-Holstein	1988	3	2	male
29423	Wadden Sea of Schleswig-Holstein	1988	10	3	male
29424	Wadden Sea of Schleswig-Holstein	1988	5	2	male
29425	Wadden Sea of Schleswig-Holstein	1988	8	3	female		x
29427	Wadden Sea of Schleswig-Holstein	1988	3	2	female
29428	Wadden Sea of Schleswig-Holstein	1988	5	2	male
29429	Wadden Sea of Schleswig-Holstein	1988	9	3	male
29430	Wadden Sea of Schleswig-Holstein	1988	23	3	female	x
29431	Wadden Sea of Schleswig-Holstein	1988	4	2	female
29432	Wadden Sea of Schleswig-Holstein	1988	10	3	female
29433	Wadden Sea of Schleswig-Holstein	1988	3	2	female
29434	Wadden Sea of Schleswig-Holstein	1988	8	3	male
29435	Wadden Sea of Schleswig-Holstein	1988	16	3	male
29436	Wadden Sea of Schleswig-Holstein	1988	6	3	female	x
29437	Wadden Sea of Schleswig-Holstein	1988	7	3	female
29438	Wadden Sea of Schleswig-Holstein	1988	13	3	female
29439	Wadden Sea of Schleswig-Holstein	1988	7	3	male
29440	Wadden Sea of Schleswig-Holstein	1988	18	3	male	x
29441	Wadden Sea of Schleswig-Holstein	1988	8	3	male	x
29442	Wadden Sea of Schleswig-Holstein	1988	9	3	male	x		x
29443	Wadden Sea of Schleswig-Holstein	1988	6	3	male
29444	Wadden Sea of Schleswig-Holstein	1988	2	2	male
29445	Wadden Sea of Schleswig-Holstein	1988	1.08333	2	male
29446	Wadden Sea of Schleswig-Holstein	1988	2	2	female
29447	Wadden Sea of Schleswig-Holstein	1988	6	3	male
29448	Wadden Sea of Schleswig-Holstein	1988	9	3	male
29449	Wadden Sea of Schleswig-Holstein	1988	25	3	female
29450	Wadden Sea of Schleswig-Holstein	1988	8	3	male
29451	Wadden Sea of Schleswig-Holstein	1988	6	3	female
29452	Wadden Sea of Schleswig-Holstein	1988	9	3	female
29453	Wadden Sea of Schleswig-Holstein	1988	12	3	female
29455	Wadden Sea of Schleswig-Holstein	1988	4	2	male
29456	Wadden Sea of Schleswig-Holstein	1988	5	2	female
29457	Wadden Sea of Schleswig-Holstein	1988	9	3	male
29458	Wadden Sea of Schleswig-Holstein	1988	8	3	male
29459	Wadden Sea of Schleswig-Holstein	1988	6	3	female
29460	Wadden Sea of Schleswig-Holstein	1988	6	3	female
29461	Wadden Sea of Schleswig-Holstein	1988	11	3	male	x
29462	Wadden Sea of Schleswig-Holstein	1988	10	3	male				x
29463	Wadden Sea of Schleswig-Holstein	1988	15	3	male	x
29464	Wadden Sea of Schleswig-Holstein	1988	8	3	male	x
29465	Wadden Sea of Schleswig-Holstein	1988	4	2	male
29466	Wadden Sea of Schleswig-Holstein	1988	3	2	male
29467	Wadden Sea of Schleswig-Holstein	1988	8	3	male
29468	Wadden Sea of Schleswig-Holstein	1988	4	2	female	x			x
29469	Wadden Sea of Schleswig-Holstein	1988	6	3	female	x
29470	Wadden Sea of Schleswig-Holstein	1988	8	3	male
29471	Wadden Sea of Schleswig-Holstein	1988	2	2	female
29472	Wadden Sea of Schleswig-Holstein	1988	7	3	male
29474	Wadden Sea of Schleswig-Holstein	1988	4	2	female
29475	Wadden Sea of Schleswig-Holstein	1988	2	2	female
29477	Wadden Sea of Schleswig-Holstein	1988	6	3	male
29478	Wadden Sea of Schleswig-Holstein	1988	14	3	male	x
29479	Wadden Sea of Schleswig-Holstein	1988	4	2	male
29480	Wadden Sea of Schleswig-Holstein	1988	4	2	male
29481	Wadden Sea of Schleswig-Holstein	1988	22	3	male	x
29482	Wadden Sea of Schleswig-Holstein	1988	5	2	male
29483	Wadden Sea of Schleswig-Holstein	1988	24	3	female	x
29484	Wadden Sea of Schleswig-Holstein	1988	2	2	male
29485	Wadden Sea of Schleswig-Holstein	1988	10	3	female	x	x
29487	Wadden Sea of Schleswig-Holstein	1988	10	3	male
29488	Wadden Sea of Schleswig-Holstein	1988	24	3	female	x
29489	Wadden Sea of Schleswig-Holstein	1988	10	3	male
29490	Wadden Sea of Schleswig-Holstein	1988	17	3	female	x
29492	Wadden Sea of Schleswig-Holstein	1988	4	2	female
29493	Wadden Sea of Schleswig-Holstein	1988	6	3	female
29494	Wadden Sea of Schleswig-Holstein	1988	1.08333	2	female
29495	Wadden Sea of Schleswig-Holstein	1988	3	2	male
29496	Wadden Sea of Schleswig-Holstein	1988	3	2	female
29498	Wadden Sea of Schleswig-Holstein	1988	23	3	female				x
29499	Wadden Sea of Schleswig-Holstein	1988	0.0833333	1	male
29500	Wadden Sea of Schleswig-Holstein	1988	3	2	male
29502	Wadden Sea of Schleswig-Holstein	1988	8	3	male
29503	Wadden Sea of Schleswig-Holstein	1988	8	3	male
29505	Wadden Sea of Schleswig-Holstein	1988	8	3	male	x
29506	Wadden Sea of Schleswig-Holstein	1988	3	2	male		x
29507	Wadden Sea of Schleswig-Holstein	1988	7	3	female
29508	Wadden Sea of Schleswig-Holstein	1988	10	3	male
29509	Wadden Sea of Schleswig-Holstein	1988	6	3	male
29510	Wadden Sea of Schleswig-Holstein	1988	8	3	male
29511	Wadden Sea of Schleswig-Holstein	1988	12	3	male
29512	Wadden Sea of Schleswig-Holstein	1988	3	2	female
29513	Wadden Sea of Schleswig-Holstein	1988	9	3	male
29514	Wadden Sea of Schleswig-Holstein	1988	14	3	female
29516	Wadden Sea of Schleswig-Holstein	1988	11	3	male
29517	Wadden Sea of Schleswig-Holstein	1988	9	3	male
29518	Wadden Sea of Schleswig-Holstein	1988	13	3	male	x			x
29519	Wadden Sea of Schleswig-Holstein	1988	6	3	male
29520	Wadden Sea of Schleswig-Holstein	1988	2	2	female
29523	Wadden Sea of Schleswig-Holstein	1988	12	3	female
29524	Wadden Sea of Schleswig-Holstein	1988	5	2	female
29525	Wadden Sea of Schleswig-Holstein	1988	9	3	male	x
29526	Wadden Sea of Schleswig-Holstein	1988	5	2	male
29527	Wadden Sea of Schleswig-Holstein	1988	7	3	female
29528	Wadden Sea of Schleswig-Holstein	1988	6	3	male
29529	Wadden Sea of Schleswig-Holstein	1988	5	2	female
29530	Wadden Sea of Schleswig-Holstein	1988	4	2	female
29531	Wadden Sea of Schleswig-Holstein	1988	6	3	female
29532	Wadden Sea of Schleswig-Holstein	1988	7	3	male
29533	Wadden Sea of Schleswig-Holstein	1988	9	3	male	x
29533	Wadden Sea of Schleswig-Holstein	1988	12	3	male
29534	Wadden Sea of Schleswig-Holstein	1988	3	2	female
29534	Wadden Sea of Schleswig-Holstein	1988	16	3	male	x	x		x
29536	Wadden Sea of Schleswig-Holstein	1988	5	2	female
29537	Wadden Sea of Schleswig-Holstein	1988	5	2	male
29538	Wadden Sea of Schleswig-Holstein	1988	15	3	female				x
29539	Wadden Sea of Schleswig-Holstein	1988	15	3	male	x			x
29540	Wadden Sea of Schleswig-Holstein	1988	14	3	female
29541	Wadden Sea of Schleswig-Holstein	1988	8	3	female
29542	Wadden Sea of Schleswig-Holstein	1988	9	3	male				x
29543	Wadden Sea of Schleswig-Holstein	1988	12	3	male	x
29544	Wadden Sea of Schleswig-Holstein	1988	9	3	male	x			x
29545	Wadden Sea of Schleswig-Holstein	1988	7	3	female	x
29548	Wadden Sea of Schleswig-Holstein	1988	6	3	male				x
29549	Wadden Sea of Schleswig-Holstein	1988	18	3	male	x
29550	Wadden Sea of Schleswig-Holstein	1988	2	2	female
29551	Wadden Sea of Schleswig-Holstein	1988	12	3	female
29552	Wadden Sea of Schleswig-Holstein	1988	10	3	male
29554	Wadden Sea of Schleswig-Holstein	1988	11	3	male	x
29555	Wadden Sea of Schleswig-Holstein	1988	3	2	female
29556	Wadden Sea of Schleswig-Holstein	1988	16	3	male	x
29557	Wadden Sea of Schleswig-Holstein	1988	9	3	female				x
29558	Wadden Sea of Schleswig-Holstein	1988	9	3	female
29559	Wadden Sea of Schleswig-Holstein	1988	8	3	male
29560	Wadden Sea of Schleswig-Holstein	1988	5	2	male
29561	Wadden Sea of Schleswig-Holstein	1988	6	3	female
29562	Wadden Sea of Schleswig-Holstein	1988	7	3	male
29563	Wadden Sea of Schleswig-Holstein	1988	7	3	male	x
29565	Wadden Sea of Schleswig-Holstein	1988	11	3	male
29566	Wadden Sea of Schleswig-Holstein	1988	10	3	male	x
29567	Wadden Sea of Schleswig-Holstein	1988	10	3	male	x
29568	Wadden Sea of Schleswig-Holstein	1988	6	3	female
29569	Wadden Sea of Schleswig-Holstein	1988	8	3	female
29571	Wadden Sea of Schleswig-Holstein	1988	10	3	female
29572	Wadden Sea of Schleswig-Holstein	1988	23	3	female
29575	Wadden Sea of Schleswig-Holstein	1988	9	3	female
29576	Wadden Sea of Schleswig-Holstein	1988	6	3	female
29577	Wadden Sea of Schleswig-Holstein	1988	2	2	female
29578	Wadden Sea of Schleswig-Holstein	1988	2	2	male
29579	Wadden Sea of Schleswig-Holstein	1988	11	3	female
29580	Wadden Sea of Schleswig-Holstein	1988	22	3	female	x
29581	Wadden Sea of Schleswig-Holstein	1988	2	2	female
29582	Wadden Sea of Schleswig-Holstein	1988	8	3	female	x
29583	Wadden Sea of Schleswig-Holstein	1988	4	2	female
29584	Wadden Sea of Schleswig-Holstein	1988	9	3	female
29585	Wadden Sea of Schleswig-Holstein	1988	10	3	male
29586	Wadden Sea of Schleswig-Holstein	1988	5	2	female
29587	Wadden Sea of Schleswig-Holstein	1988	3	2	female
29588	Wadden Sea of Schleswig-Holstein	1988	2	2	male
29590	Wadden Sea of Schleswig-Holstein	1988	4	2	male
29591	Wadden Sea of Schleswig-Holstein	1988	2	2	male
29593	Wadden Sea of Schleswig-Holstein	1988	1.08333	2	female
29594	Wadden Sea of Schleswig-Holstein	1988	5	2	male			x
29596	Wadden Sea of Schleswig-Holstein	1988	7	3	female
29609	Wadden Sea of Schleswig-Holstein	1988	8	3	male
29617	Wadden Sea of Schleswig-Holstein	1988	17	3	male	x			x
29618	Wadden Sea of Schleswig-Holstein	1988	16	3	male	x
29619	Wadden Sea of Schleswig-Holstein	1988	5	2	male
29621	Wadden Sea of Schleswig-Holstein	1988	3	2	female
29627	Wadden Sea of Schleswig-Holstein	1988	2	2	female
29628	Wadden Sea of Schleswig-Holstein	1988	2	2	male
29630	Wadden Sea of Schleswig-Holstein	1988	1	2	female
29636	Wadden Sea of Schleswig-Holstein	1988	1	2	female
29639	Wadden Sea of Schleswig-Holstein	1988	5	2	male
29640	Wadden Sea of Schleswig-Holstein	1988	6	3	female		x
29643	Wadden Sea of Schleswig-Holstein	1988	18	3	female			x
29650	Wadden Sea of Schleswig-Holstein	1988	4	2	female
29656	Wadden Sea of Schleswig-Holstein	1988	11	3	male
29663	Wadden Sea of Schleswig-Holstein	1988	3	2	female
29667	Wadden Sea of Schleswig-Holstein	1988	3	2	female
29671	Wadden Sea of Schleswig-Holstein	1988	4	2	female
29672	Wadden Sea of Schleswig-Holstein	1988	4	2	female	x
29676	Wadden Sea of Schleswig-Holstein	1988	13	3	female
29677	Wadden Sea of Schleswig-Holstein	1988	16	3	male	x
29678	Wadden Sea of Schleswig-Holstein	1988	13	3	male	x
29679	Wadden Sea of Schleswig-Holstein	1988	4	2	female
29681	Wadden Sea of Schleswig-Holstein	1988	4	2	female
29682	Wadden Sea of Schleswig-Holstein	1988	4	2	female
29700	Wadden Sea of Schleswig-Holstein	1988	10	3	female	x
29701	Wadden Sea of Schleswig-Holstein	1988	7	3	female
29702	Wadden Sea of Schleswig-Holstein	1988	3	2	male
29703	Wadden Sea of Schleswig-Holstein	1988	6	3	male
29704	Wadden Sea of Schleswig-Holstein	1988	5	2	male
29705	Wadden Sea of Schleswig-Holstein	1988	6	3	male
29706	Wadden Sea of Schleswig-Holstein	1988	11	3	male	x
29707	Wadden Sea of Schleswig-Holstein	1988	4	2	female				x
29708	Wadden Sea of Schleswig-Holstein	1988	2	2	male		x
29709	Wadden Sea of Schleswig-Holstein	1988	11	3	male	x			x
29710	Wadden Sea of Schleswig-Holstein	1988	15	3	male	x			x
29755	Wadden Sea of Schleswig-Holstein	1990	7	3	female
29756	Wadden Sea of Schleswig-Holstein	1990	16	3	female
29757	Wadden Sea of Schleswig-Holstein	1990	5	2	female
29814	Wadden Sea of Schleswig-Holstein	1990	23	3	male	x		x	x
29816	Wadden Sea of Schleswig-Holstein	1990	4	2	male
29819	Wadden Sea of Schleswig-Holstein	1990	0.75	2	female
29820	Wadden Sea of Schleswig-Holstein	1989	0.166667	2	male
29847	Wadden Sea of Schleswig-Holstein	1990	5	2	female
29848	Wadden Sea of Schleswig-Holstein	1990	10	3	female
29903	Wadden Sea of Schleswig-Holstein	1990	2	2	female
29904	Wadden Sea of Schleswig-Holstein	1990	9	3	male
29905	Wadden Sea of Schleswig-Holstein	1990	6	3	male
29933	Wadden Sea of Schleswig-Holstein	1990	5	2	male
29934	Wadden Sea of Schleswig-Holstein	1990	17	3	male	x
29935	Wadden Sea of Schleswig-Holstein	1990	9	3	male
29936	Wadden Sea of Schleswig-Holstein	1990	10	3	female
29937	Wadden Sea of Schleswig-Holstein	1990	7	3	female	x
29939	Wadden Sea of Schleswig-Holstein	1990	9	3	male
29971	Wadden Sea of Schleswig-Holstein	1990	0.0384615	1	male
29972	Wadden Sea of Schleswig-Holstein	1990	0.0833333	1	male		x
29973	Wadden Sea of Schleswig-Holstein	1990	0.25	2	female		x
30005	Wadden Sea of Lower Saxony	1988	4	2	male	x
30007	Wadden Sea of Lower Saxony	1988	1	2	female
30008	Wadden Sea of Lower Saxony	1988	1	2	female
30009	Wadden Sea of Lower Saxony	1988	3	2	male
30010	Wadden Sea of Lower Saxony	1988	2	2	female
30011	Wadden Sea of Lower Saxony	1988	1	2	male
30012	Wadden Sea of Lower Saxony	1988	1	2	female
30013	Wadden Sea of Lower Saxony	1988	1	2	female
30014	Wadden Sea of Lower Saxony	1988	0.75	2	male
30015	Wadden Sea of Lower Saxony	1988	1	2	male
30016	Wadden Sea of Lower Saxony	1988	5	2	female
30017	Wadden Sea of Lower Saxony	1988	0.25	2	female
30018	Wadden Sea of Lower Saxony	1988	1	2	male
30019	Wadden Sea of Lower Saxony	1988	1	2	female
30020	Wadden Sea of Lower Saxony	1988	1	2	male
30021	Wadden Sea of Lower Saxony	1988	1	2	female
30022	Wadden Sea of Lower Saxony	1988	7	3	male
30023	Wadden Sea of Lower Saxony	1988	24	3	female
30024	Wadden Sea of Lower Saxony	1988	0.25	2	male
30025	Wadden Sea of Lower Saxony	1988	1	2	female
30026	Wadden Sea of Hamburg & Elbe Estuary	1988	6	3	female
30028	Wadden Sea of Lower Saxony	1988	1	2	female
30029	Wadden Sea of Lower Saxony	1988	7	3	female	x
30030	Wadden Sea of Hamburg & Elbe Estuary	1989	0.5	2	female
30031	Wadden Sea of Lower Saxony	1988	0.166667	2	male
30032	Wadden Sea of Lower Saxony	1988	0.25	2	male
30033	Wadden Sea of Lower Saxony	1988	3	2	female
30034	Wadden Sea of Lower Saxony	1988	18	3	female				x
30034	Wadden Sea of Lower Saxony	1988	3	2	female
30035	Wadden Sea of Lower Saxony	1988	3	2	male
30036	Wadden Sea of Lower Saxony	1988	0.166667	2	female	x
30037	Wadden Sea of Lower Saxony	1988	1	2	female
30038	Wadden Sea of Lower Saxony	1988	16	3	male	x
30039	Wadden Sea of Lower Saxony	1988	1	2	female
30040	Wadden Sea of Lower Saxony	1988	5	2	male
30041	Wadden Sea of Lower Saxony	1988	10	3	female
30042	Wadden Sea of Lower Saxony	1988	7	3	female
30043	Wadden Sea of Lower Saxony	1988	1	2	male
30044	Wadden Sea of Lower Saxony	1988	1	2	male		x
30045	Wadden Sea of Lower Saxony	1988	4	2	female
30046	Wadden Sea of Lower Saxony	1988	6	3	female
30047	Wadden Sea of Lower Saxony	1988	10	3	male	x
30048	Wadden Sea of Lower Saxony	1988	3	2	male
30049	Wadden Sea of Schleswig-Holstein	1988	11	3	female	x			x
30050	Wadden Sea of Lower Saxony	1988	8	3	female
30051	Wadden Sea of Lower Saxony	1988	5	2	male
30052	Wadden Sea of Lower Saxony	1988	3	2	female
30053	Wadden Sea of Lower Saxony	1988	2	2	female
30054	Wadden Sea of Lower Saxony	1988	1	2	female
30055	Wadden Sea of Lower Saxony	1988	0.0833333	1	male
30056	Wadden Sea of Lower Saxony	1988	12	3	male				x
30057	Wadden Sea of Lower Saxony	1988	1	2	female
30058	Wadden Sea of Lower Saxony	1988	6	3	male
30059	Wadden Sea of Lower Saxony	1988	3	2	male
30060	Wadden Sea of Lower Saxony	1988	4	2	female
30061	Wadden Sea of Lower Saxony	1988	10	3	male
30062	Wadden Sea of Lower Saxony	1988	4	2	male
30063	Wadden Sea of Lower Saxony	1988	9	3	female
30064	Wadden Sea of Lower Saxony	1988	5	2	female
30065	Wadden Sea of Lower Saxony	1988	1	2	male
30066	Wadden Sea of Lower Saxony	1988	0.25	2	female
30067	Wadden Sea of Lower Saxony	1988	0.0833333	1	female
30221	Wadden Sea of Schleswig-Holstein	1991	0.583333	2	male
30222	Wadden Sea of Schleswig-Holstein	1991	2	2	male
30224	Wadden Sea of Schleswig-Holstein	1991	7	3	female
30225	Wadden Sea of Schleswig-Holstein	1991	7	3	male
30270	Wadden Sea of Schleswig-Holstein	1991	15	3	female
30272	Wadden Sea of Schleswig-Holstein	1991	3	2	male
30275	Wadden Sea of Schleswig-Holstein	1991	0.666667	2	male		x
30480	Wadden Sea of Schleswig-Holstein	1991	1	2	female
30481	Wadden Sea of Schleswig-Holstein	1991	6	3	female
30482	Wadden Sea of Schleswig-Holstein	1991	12	3	male	x
30493	Wadden Sea of Lower Saxony	1988	7	3	male
30494	Wadden Sea of Lower Saxony	1988	1	2	male
30496	Wadden Sea of Lower Saxony	1988	13	3	male	x
30497	Wadden Sea of Schleswig-Holstein	1991	6	3	female	x
30498	Wadden Sea of Schleswig-Holstein	1991	5	2	female
30499	Wadden Sea of Schleswig-Holstein	1991	6	3	female
30500	Wadden Sea of Schleswig-Holstein	1991	1.08333	2	female
30600	Wadden Sea of Schleswig-Holstein	1991	19	3	female	x		x	x
30602	Wadden Sea of Schleswig-Holstein	1991	7	3	female
30603	Wadden Sea of Schleswig-Holstein	1991	6	3	male
30604	Wadden Sea of Schleswig-Holstein	1991	8	3	male
30605	Wadden Sea of Schleswig-Holstein	1991	1.08333	2	female
30606	Wadden Sea of Schleswig-Holstein	1991	1.08333	2	male
30637	Wadden Sea of Schleswig-Holstein	1991	1.25	2	female		x
30639	Wadden Sea of Schleswig-Holstein	1991	6	3	male
30640	Wadden Sea of Schleswig-Holstein	1991	10	3	male	x
30642	Wadden Sea of Hamburg & Elbe Estuary	1988	9	3	male	x
30643	Wadden Sea of Lower Saxony	1988	1.08333	2	male	x
30646	Wadden Sea of Hamburg & Elbe Estuary	1988	10	3	female				x
30648	Wadden Sea of Lower Saxony	1988	3	2	female
30649	Wadden Sea of Lower Saxony	1988	1.5	2	male
30650	Wadden Sea of Lower Saxony	1988	3	2	female
30651	Wadden Sea of Lower Saxony	1988	8	3	male
30652	Wadden Sea of Hamburg & Elbe Estuary	1988	0.115385	2	male
30653	Wadden Sea of Hamburg & Elbe Estuary	1988	1	2	female
30654	Wadden Sea of Hamburg & Elbe Estuary	1988	2	2	female
30655	Wadden Sea of Lower Saxony	1988	3	2	male
30656	Wadden Sea of Lower Saxony	1988	0.833333	2	male
30657	Wadden Sea of Lower Saxony	1988	6	3	male
30658	Wadden Sea of Hamburg & Elbe Estuary	1988	17	3	female				x
30659	Wadden Sea of Lower Saxony	1988	1.16667	2	male
30660	Wadden Sea of Hamburg & Elbe Estuary	1988	13	3	male	x
30661	Wadden Sea of Lower Saxony	1988	1.16667	2	female
30662	Wadden Sea of Schleswig-Holstein	1988	10	3	female	x
30664	Wadden Sea of Lower Saxony	1988	0.115385	2	male
30665	Wadden Sea of Hamburg & Elbe Estuary	1988	8	3	female
30666	Wadden Sea of Hamburg & Elbe Estuary	1988	5	2	male	x
30668	Wadden Sea of Hamburg & Elbe Estuary	1988	6	3	female				x
30670	Wadden Sea of Lower Saxony	1988	11	3	male
30671	Wadden Sea of Lower Saxony	1988	7	3	female
30674	Wadden Sea of Hamburg & Elbe Estuary	1988	4	2	female
30675	Wadden Sea of Lower Saxony	1988	2	2	female
30676	Wadden Sea of Lower Saxony	1988	1	2	female
30677	Wadden Sea of Hamburg & Elbe Estuary	1988	22	3	female
30678	Wadden Sea of Lower Saxony	1988	10	3	female	x
30679	Wadden Sea of Hamburg & Elbe Estuary	1988	5	2	female
30680	Wadden Sea of Lower Saxony	1988	3	2	male
30681	Wadden Sea of Hamburg & Elbe Estuary	1988	4	2	female		x
30771	Wadden Sea of Schleswig-Holstein	1991	6	3	female
30775	Wadden Sea of Schleswig-Holstein	1991	11	3	male	x
30776	Wadden Sea of Schleswig-Holstein	1991	11	3	male
30777	Wadden Sea of Schleswig-Holstein	1991	7	3	male
30778	Wadden Sea of Schleswig-Holstein	1991	5	2	male
30779	Wadden Sea of Schleswig-Holstein	1991	13	3	male	x
30780	Wadden Sea of Schleswig-Holstein	1991	8	3	female		x
30808	Wadden Sea of Schleswig-Holstein	1992	0.583333	2	female
30951	Wadden Sea of Schleswig-Holstein	1992	0.75	2	female
30952	Wadden Sea of Schleswig-Holstein	1992	0.583333	2	male
30953	Wadden Sea of Schleswig-Holstein	1992	0.666667	2	male		x
30956	Wadden Sea of Schleswig-Holstein	1992	5	2	male
30994	Wadden Sea of Schleswig-Holstein	1992	7	3	male
30995	Wadden Sea of Schleswig-Holstein	1992	7	3	male
30996	Wadden Sea of Schleswig-Holstein	1992	12	3	male
30997	North Sea	1992	13	3	female
30998	Wadden Sea of Schleswig-Holstein	1992	1.08333	2	male
30999	Wadden Sea of Schleswig-Holstein	1992	2	2	male
31015	Wadden Sea of Schleswig-Holstein	1992	7	3	male
31016	Wadden Sea of Schleswig-Holstein	1992	0.75	2	female
31017	Wadden Sea of Schleswig-Holstein	1992	0.166667	2	male
31041	Wadden Sea of Schleswig-Holstein	1992	0.115385	2	male
31042	Wadden Sea of Schleswig-Holstein	1991	8	3	male
31044	Wadden Sea of Schleswig-Holstein	1992	2	2	female	x
31045	Wadden Sea of Schleswig-Holstein	1992	9	3	male
31047	Wadden Sea of Schleswig-Holstein	1992	0.416667	2	female		x
31048	Wadden Sea of Schleswig-Holstein	1992	0.416667	2	female
31049	Wadden Sea of Schleswig-Holstein	1992	9	3	male
31050	Wadden Sea of Schleswig-Holstein	1992	13	3	male
31051	Wadden Sea of Schleswig-Holstein	1992	8	3	male
31127	North Sea	1993	17	3	male
31132	Wadden Sea of Schleswig-Holstein	1992	9	3	male	x
31195	Wadden Sea of Schleswig-Holstein	1993	23	3	female	x			x
31196	Wadden Sea of Schleswig-Holstein	1993	12	3	male				x
31215	Wadden Sea of Schleswig-Holstein	1993	0.666667	2	female
31218	Wadden Sea of Schleswig-Holstein	1992	10	3	female
31220	Wadden Sea of Schleswig-Holstein	1993	6	3	female
31223	Wadden Sea of Schleswig-Holstein	1993	11	3	female
31224	Wadden Sea of Schleswig-Holstein	1993	7	3	female	x
31246	Wadden Sea of Schleswig-Holstein	1993	2	2	male		x
31247	Wadden Sea of Schleswig-Holstein	1993	14	3	male	x			x
31270	Wadden Sea of Schleswig-Holstein	1993	8	3	female
31271	Wadden Sea of Schleswig-Holstein	1993	2	2	female		x
31273	Wadden Sea of Schleswig-Holstein	1993	3	2	female
31274	Wadden Sea of Schleswig-Holstein	1993	1	2	male
31277	Wadden Sea of Schleswig-Holstein	1993	18	3	male	x
31278	Wadden Sea of Schleswig-Holstein	1993	5	2	male
31319	Wadden Sea of Schleswig-Holstein	1993	13	3	male
31320	Wadden Sea of Schleswig-Holstein	1993	3	2	female
31452	Wadden Sea of Schleswig-Holstein	1994	0.5	2	female
31453	Wadden Sea of Schleswig-Holstein	1994	0.5	2	male
31455	Wadden Sea of Schleswig-Holstein	1994	0.0833333	1	male
31457	Wadden Sea of Schleswig-Holstein	1994	23	3	female	x
31458	North Sea	1994	14	3	male	x
31459	Wadden Sea of Schleswig-Holstein	1993	17	3	female
31460	Wadden Sea of Schleswig-Holstein	1994	10	3	male	x
31461	Wadden Sea of Schleswig-Holstein	1994	12	3	female				x
31469	Wadden Sea of Schleswig-Holstein	1994	2	2	female
31515	Wadden Sea of Schleswig-Holstein	1994	17	3	male
31516	Wadden Sea of Schleswig-Holstein	1994	9	3	male			x
31517	Wadden Sea of Schleswig-Holstein	1994	24	3	male	x			x
31518	Wadden Sea of Schleswig-Holstein	1994	11	3	male				x
31519	Wadden Sea of Schleswig-Holstein	1994	3	2	male
31520	Wadden Sea of Schleswig-Holstein	1994	10	3	male
31521	Wadden Sea of Schleswig-Holstein	1994	2	2	female
31522	Wadden Sea of Schleswig-Holstein	1994	10	3	male	x
31524	Wadden Sea of Schleswig-Holstein	1994	14	3	male
31525	Wadden Sea of Schleswig-Holstein	1994	9	3	male	x
31555	Wadden Sea of Schleswig-Holstein	1994	14	3	male
31556	Wadden Sea of Schleswig-Holstein	1994	10	3	male
31557	Wadden Sea of Schleswig-Holstein	1994	13	3	female	x
31558	Wadden Sea of Schleswig-Holstein	1994	13	3	male	x		x	x
31559	Wadden Sea of Schleswig-Holstein	1994	8	3	male	x
31560	Wadden Sea of Schleswig-Holstein	1994	9	3	female
31561	Wadden Sea of Schleswig-Holstein	1994	19	3	male	x		x
31563	Wadden Sea of Schleswig-Holstein	1994	11	3	male
No number 01	Wadden Sea of Schleswig-Holstein	1988	23	3	female
No number 02	Wadden Sea of Schleswig-Holstein	1990	0.666667	2	female	x
No number 03	Wadden Sea of Schleswig-Holstein	1977	4	2	male
No number 04	Wadden Sea of Schleswig-Holstein	1988	7	3	male
No number 05	Wadden Sea of Schleswig-Holstein	1988	7	3	male
No number 06	Wadden Sea of Schleswig-Holstein	1994	9	3	female				x
